# Supplementary material for: A Global Evaluation of Daily to Seasonal Aerosol and Water Vapor Relationships Using a Combination of AERONET and NAAPS Reanalysis Data
Source: Copernicus journal article supplement (doi:10.5194/acp-2022-594), 2022-10-11
Supplement: Supplementary file [file acp-2022-594-RC2-supplement.pdf]

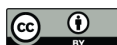

# A Global Evaluation of Daily to Seasonal Aerosol and Water Vapor Relationships Using a Combination of AERONET and NAAPS Reanalysis Data

Juli I. Rubin<sup>1</sup>, Jeffrey S. Reid<sup>2</sup>, Peng Xian<sup>2</sup>, Christopher M. Selman<sup>1</sup>, and Thomas F. Eck<sup>3,4</sup>

<sup>1</sup>U.S. Naval Research Laboratory, Washington, DC, 20375, USA

<sup>2</sup>U.S. Naval Research Laboratory, Monterey, CA, 93943, USA

<sup>3</sup>NASA Goddard Space Flight Center, Greenbelt, MD, 20771, USA

<sup>4</sup>Goddard Earth Sciences Technology and Research (GESTAR) II, University of Maryland Baltimore County, Baltimore, MD 21250, USA

Correspondence to: Juli I. Rubin (juli.rubin@nrl.navy.mil)

**Abstract.** The co-transport of aerosol particles and water vapor has long been noted in the literature, with a myriad of implications from air mass characterization to radiative transfer. In this study, the relationship between aerosol optical depth (AOD) and precipitable water vapor (PW) is evaluated to our knowledge for the first time globally, at daily to seasonal levels using approximately 20 years of AERONET observational data and the 16-year NAAPS reanalysis v1.0 (NAAPS-RA) model fields. The combination of AERONET observations with small associated uncertainties and the reanalysis fields with full global coverage is used to provide a best estimate of the seasonal AOD and PW relationships, including an evaluation of correlations, slope, and PW probability distributions for identification of statistically significant differences in PW for high AOD events. The relationships produced from the AERONET and NAAPS-RA datasets were compared against each other and showed consistency, indicating that the NAAPS-RA provides a realistic representation of the AOD and PW relationship. The initial analysis is then extended to layer AOD and PW relationships for proxies of the planetary boundary layer, and lower, middle and upper free troposphere. It was found that the dominant AOD and PW relationship is positive, supported by both AERONET and model evaluation, which varies in strength by season and location. These relationships were found to be statistically significant and present across the globe, observed on an event by event level. Evaluations at individual AERONET sites implicate synoptic-scale transport as a contributing factor in these relationships at daily levels. Negative AOD and PW relationships were identified and predominantly associated with regional dry season timescales in which biomass burning is the predominant aerosol type. This is not an indication of dry air association with smoke aerosol for an individual event, but is more a reflection of the overall dry conditions leading to more biomass burning and higher associated AOD values. Stronger correlations between AOD and PW are found when evaluating the data by vertical layers, including boundary layer, lower/middle/upper free troposphere (corresponding to typical water vapor channels), with the largest correlations observed in the free troposphere-indicative of aerosol and water vapor transport events. By evaluating variability between PW and relative humidity in the NAAPS-RA, hygroscopic growth was found to 1) amplify positive AOD-PW relationships, particularly in the mid-latitudes; 2) diminish negative relationships in dominant biomass burning regions; and 3) leads to statistically insignificant changes in PW for high AOD events in ocean regions. The importance of hygroscopic growth in these relationships indicates that PW is a useful tracer for AOD, but not necessarily as strongly for aerosol mass. Synoptic-scale African dust events are an exception where PW is a strong tracer for aerosol shown by strong relationships even with hygroscopic effects. Given these results, PW can be exploited in coupled aerosol and meteorology data assimilation for AOD and the collocation of aerosol and water vapor should be carefully taken into account when evaluating radiative impacts of aerosol, with the season and location in mind.

This is also very important for retrievals of PM from space

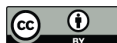

**43 DISTRIBUTION STATEMENT A. Approved for public release. Distribution is unlimited.**

**44 1.0- Introduction**

45 The definition of an aerosol is that it is a colloidal system of particles or droplets suspended in a dispersed gaseous  
 46 medium (American Meteorological Society, 2020). While the word “aerosol” is often taken to represent only the  
 47 particulate phase, the true definition reminds us of the thermodynamic, compositional and radiative “whole” that  
 48 makes up the particulate and dispersed phases of an aerosol parcel. With this definition in mind, an important aspect  
 49 of aerosol parcels that should be considered is the covariability between the aerosol particles and the dispersed water  
 50 vapor. While the aerosol and water vapor relationship is generally accounted for in the context of relative humidity,  
 51 hygroscopicity, and optical properties (e.g., Hänel et al., 1976; Charlson et al. 1992), the covariability of aerosol  
 52 particles and dispersed water vapor is important in its own right. Early studies of co-located aerosol and water vapor  
 53 measurements demonstrated the structural covariability between the two components (e.g., Stull and Eloranta 1984;  
 54 Kleinman and Daum, 1991; Turner 2002; De Tomasi and Perrone, 2003). Now, coupled aerosol-water vapor profiles  
 55 are commonly used to infer aerosol layer structure (e.g., Livingston et al., 2003; Reid et al., 2003; 2008; 2019; Wang  
 56 et al. 2012; Yufeng et al., 2018), cloud detrainment (Su et al., 2011; Reid et al., 2019; He et al., 2021) and mixed layer  
 57 properties (Späth et al., 2016). Even integrated aerosol optical depth (AOD) and precipitable water vapor (PW)  
 58 comparisons have utility and have been used to identify air masses, transport pathways, and aerosol optical properties.  
 59 Regional studies include Africa (Kumar et al., 2017, Xian et al. 2020), the Amazon (Kaufman and Frasier, 1997;  
 60 Martins et al., 2018), India (Kumar et al., 2013; and Kannemadugu et al., 2015), and North America (O’Neil et al.,  
 61 1993; Smirnov et al., 1994). Notable examples of co-transport of aerosol particles and water vapor include the African  
 62 Monsoon Multidisciplinary Analysis (AMMA) in which elevated biomass burning aerosol layers were found with  
 63 higher water vapor concentrations than the surrounding air (Kim et al. 2009). Likewise, Marsham et al., 2016  
 64 investigated water vapor enhancements with dust in the Saharan Air Layer (SAL).

65  
 66 It should be noted that higher PW amounts are typically associated with higher cloud cover fractions. These higher  
 67 cloud fractions create additional environmental conditions for enhancements of the aerosol AOD and PW relationship.  
 68 There is a high RH halo around cumulus clouds (Radke and Hobbs, 1991; Perry and Hobbs, 1996) which increases  
 69 the near cloud hygroscopic growth of aerosol. Additionally, the passage of aerosol through clouds by convection  
 70 and/or advection also increases hygroscopic growth. Cloud processing of particles in cloud droplets and new particle  
 71 formation from gas-to-particle reactions in cloud water droplets are also important. Examples of remote sensing  
 72 observations from AERONET of cloud processing increasing AOD in layer clouds and/or fog are given in Eck et al.  
 73 (2012) and in the vicinity of cumulus clouds in Eck et al. (2014). Additionally high AOD events were often found to  
 74 be associated with clouds in East Asia (Eck et al., 2019; Arola et al., 2017).

75  
 76 In addition to its utility as a tracer for transport and mixing, the aerosol particle-water vapor co-transport are significant  
 77 in regards to their relative contributions to overall solar and terrestrial radiative effects (Rosario et al., 2011; Marsham  
 78 et al., 2016; Deaconu et al., 2019; Gutleben et al., 2019; Granados-Muñoz et al., 2019; Zhu et al., 2019; Yu et al.,  
 79 2021). Similarly, co-transport must be considered in atmospheric correction of land, ocean and atmospheric products

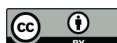

(e.g., Sobrino et al. 1993; Eck and Holben 1994; DeSouza-Machado et al., 2006; Luo et al, 2019; Zeng et al., 2017; Patadia et al., 2018; Frouin et al. 2019, Ibrahim et al. 2019; Miller et al. 2019). As previously noted, there are also links to cloud development and potentially indirect effects (Ten Hoeve et al., 2011; Pistone et al., 2016). Ultimately, the coupled aerosol particle- water vapor system must be considered jointly to adequately contain overall climate budgets and forcing (Kaufman and Fraser, 1997; Wong et al., 2009; Schneider et al, 2010; Sherwood et al, 2010; Haywood et al., 2011; Huttunen et al., 2014; Yu et al., 2014; Spyrou 2018).

Finally, recent advances in coupled data assimilation (DA) allow for not only a joint analysis of aerosol particles and water vapor as is done in weakly coupled approaches, but for observations to jointly influence posteriors through cross-covariances in strongly coupled DA (Liu et al., 2011; Lee et al., 2017; Ménard et al., 2019). The hope is that strongly coupled DA can be used to generate a more consistent representation of coupled atmospheric systems. In the context of the aforementioned references on the coupled aerosol particle-water vapor system, there is now a more pressing need for evaluating joint aerosol and water vapor measurements. This is further emphasized by the observed frequency of aerosol and water vapor co-transport in both forecast models and satellite observations. Similar spatial patterns between aerosol optical depth (AOD) and precipitable water vapor (PW) can be observed on a daily basis in model analyses, forecasts, and satellite products such as the Morphed Integrated Microwave Imagery at CIMSS - Total Precipitable Water (MIMIC-TPW) (Wimmers et al. 2011), particularly associated with mid-latitude fronts. An example of forecasts of TPW and AOD from the Navy Global Environmental Model (NAVGEN) (Hogan et al. 2014) and Navy Aerosol Analysis Prediction System (NAAPS; Lynch et al. 2016), respectively are shown in Figure 1 in which co-transport regions are highlighted. Aerosol and water vapor relationships are not expected to be universal and will likely vary in magnitude from air mass to air mass due to differences in sources, physics, and overall vertical distribution. While the previously mentioned studies have found relationships between aerosol and water vapor for a host of case or local studies, this relationship has not to our knowledge been evaluated on a larger spatial and temporal scale for broad applicability for aerosol forecasting and data assimilation.

This is the first of several studies developing coupled data analysis and assimilation of the water vapor- aerosol particle system. Here, the project begins by focusing on observations of synoptic scale temporal and spatial relationships using the extensive NASA Aerosol Robotic Network (AERONET; Holben et al., 1998; Giles et al., 2019). The advantage of AERONET for this study is that the data record is long and includes high frequency ground-based measurements of both aerosol in the form of AOD and water vapor in the form of PW with sites located across the globe. Additionally, AERONET measurements are made throughout the entire daylight hours when the sun is not obscured by clouds. It should be noted that this does result in a high pressure bias in AERONET data since few measurements are possible in extensive cloud fraction conditions. Another important advantage is that the observations can be made effectively in the near vicinity of clouds without the commonly observed satellite measurement artifacts of multiple scattering between clouds, molecules, and particles which enables a minimization of cloud contamination in the near vicinity of clouds as compared to satellite observations. While the AERONET network is extensive, it cannot provide a full global evaluation of the aerosol and water vapor relationship. Therefore, the relationships identified in the AERONET dataset are compared against model AOD and PW relationships found in the NAAPS reanalysis (NAAPS-RA) dataset (Lynch



et al. 2016). A description of both the AERONET and NAAPS-RA datasets and the analyses conducting for quantifying the global AOD and PW relationships are described in the Methods section below. The results of the analysis are discussed in the context of large-scale relationships between column-integrated AOD and PW. A follow-on study will then take the relationships found in this work and move on to evaluate the relationships on an event level in space and time as well as the controlling factors that drive the aerosol and water vapor relationship, in particular, how much synoptic scale transport controls the observed covariability.

## 2 Methods

In order to evaluate the relationship between column-integrated aerosol and water vapor in space and time, the AERONET observational network is used as it provides joint measurements of aerosol and water vapor with low levels of uncertainty, has a large number of sites located across the globe, and a long data record. While AERONET measurements are column-integrated, they provide a good starting point for understanding the observed aerosol and water vapor relationships at locations across the globe. As a first step, relationships are quantified at AERONET sites between daily-averaged AOD and PW measurements. The focus here is on the synoptic-scale relationships between aerosol and water vapor. Therefore, daily-averaged relationships are evaluated in this analysis, using correlations and an evaluation of the water vapor probability distributions to identify statistically significant changes in PW with AOD. The evaluation is then extended to the NAAPS-RA dataset in order to provide a more complete global perspective in the full column as well as in different vertical components of the atmosphere, including the boundary layer and free troposphere, as a means to understand how these relationships vary when considering vertical position. Finally, the impact of relative humidity and hygroscopic growth covariability on model predicted AOD and PW relationships is evaluated.

### 2.1 Data Description:

#### 2.1.1 AERONET AOD

AERONET is a global ground-based network of sun photometers that measure direct sun and sky radiances over a range of wavelengths (340–1640nm). These measurements are used to generate column-integrated aerosol properties of AOD and aerosol microphysical and radiative properties (Holben et al. 1998; Giles et al., 2019). The network includes over 600 sites with data available at <https://aeronet.gsfc.nasa.gov/>. The uncertainty in AERONET AOD is reported to be ~0.01–0.02 for level 2 data with the higher uncertainty of 0.02 pertaining to the UV wavelengths and the lower ~0.01 uncertainty associated with visible and near infrared wavelengths (Eck et al., 1999). Due to this low uncertainty, AERONET AOD observations are used for validation of satellite retrievals (Remer et al. 2002, Ichoku et al. 2002, Kahn et al. 2005) as well as for verification of model forecasts (Zhang et al. 2008, Benedetti et al. 2008, Sessions et al. 2015, Xian et al. 2019). For this analysis, AERONET version 3 (Giles et al. 2019), level 2 daily-averaged AOD observations are used. AERONET AOD observations at 675nm for all available sites were collected and sites that had a minimum of 100 daily-averaged values were retained for the analysis, with seasonal data counts in Figure 2. The 675nm wavelength was selected as it is a core AERONET wavelength that is available at all sites and provides parity for both the fine and coarse aerosol modes.

Did you use also the MAN data?

Replace with a comma





154

## 155 2.1.2 AERONET Water Vapor

156 Precipitable water vapor (PW), a measure of the total amount of water vapor contained in a vertical column from the  
 157 surface to the top of the atmosphere, is retrieved from AERONET direct sun irradiance measurements in the water  
 158 vapor absorption band around 940nm. The uncertainty of AERONET water vapor data is reported at 12% (Sano et al.  
 159 2003) and more recently, an analysis of uncertainty against radiosonde, microwave radiometry, and GPS data indicated  
 160 a dry bias of 5-6 % and a total estimated uncertainty of 12-15% (Perez-Ramirez et al. (2014)). The Perez-Ramirez et  
 161 al. (2014) evaluation with the identified uncertainty range of 12-15% included PW retrieval comparison at 3 sites  
 162 located in the tropics, mid-latitudes and the arctic, covering a range of climatic conditions and temperature/water vapor  
 163 profiles, and therefore, provides a reasonable uncertainty estimate for the entire AERONET network. The PW data  
 164 used in this analysis comes from the same AERONET version 3, level 2 daily-averaged dataset that is used for the  
 165 AOD data. As was the case for the AERONET AOD data, sites that had a minimum of 100 daily-averaged values  
 166 were retained for the analysis (Figure 2).

167

## 168 2.1.3 NAAPS Reanalysis

169 The NAAPS aerosol reanalysis v1.0 (Lynch et al. 2016) is a standardized global modal AOD product generated by  
 170 the U.S. Naval Research Laboratory (NRL) that extends over a 16 year time period (2003-2019). The core of the  
 171 aerosol reanalysis is the NAAPS offline aerosol transport model and its associated 2-dimensional variational data  
 172 assimilation system, the Navy Variational Data Assimilation System for Aerosol Optical Depth (NAVDAS-AOD).  
 173 NAAPS has been run semi-operationally at NRL since 1998 and became operational at the Fleet Numerical  
 174 Meteorology and Oceanography Center (FNMOC) in 2006 with NAVDAS-AOD operationally implemented in 2010.  
 175 For the NAAPS-RA, NAVDAS-AOD is used to assimilate quality-assured and quality-controlled AOD retrievals  
 176 from the Moderate Resolution Imaging Spectroradiometer (MODIS) and Multi-angle Imaging SpectroRadiometer  
 177 (MISR).

Are any AERONET AOD data assimilated in NAAPS-RA?

178

179 NAAPS generates 3-dimensional forecasts of dust, smoke, sea salt and a combined anthropogenic/biogenic fine  
 180 aerosol (ABF, also referred to in this work as pollution) mass concentration fields and the associated 3-dimensional  
 181 aerosol extinction and column-integrated AOD fields. As an offline model, NAAPS is driven by meteorological fields  
 182 from the Navy Global Environmental Model (NAVGEM) (Hogan et al. 2014), using analysis fields every 6 hours and  
 183 forecasts provided at 3 hour intervals. The NAVGEM analysis fields are generated using NAVDAS for assimilation  
 184 of a large number of conventional and satellite-based observations (Daley and Barker, 2001). NAVGEM variables  
 185 used by NAAPS includes the topography, sea ice, snow cover, surface stress, surface heat/moisture fluxes,  
 186 precipitation, lifting condensation level, cloud cover and height as well as 3-dimensional winds, temperature, and the  
 187 most relevant for this work, humidity. For the NAAPS analysis, aerosol sources, including dust and smoke, and  
 188 deposition processes were regionally tuned to best match observations (AERONET, MODIS). A detailed description  
 189 of the NAAPS-RA v1.0 is described in Lynch et al. 2016.

190



In NAAPS, the Hanel (1976) formulation of the hygroscopic growth factor ( $f$ ) for a given species  $i$  and relative humidity ( $r$ ) is used to represent the effect of humidity on particle light scattering, defined as:

$$f_i(r) = \left[ \frac{(1-r)}{(1-r_o)} \right]^{-\gamma_i}, \quad (1)$$

where  $\gamma_i$  is an empirical species-dependent exponent (ABF=0.5 assuming 40% sulfate and 60% organics, smoke=0.18, sea salt = 0.46, dust=0) and  $r_o$  is the reference relative humidity of 30%. The hygroscopic growth factor is applied when calculating the aerosol scattering coefficient. In order to assess the impact of hygroscopic growth on model-predicted AOD and PW correlations, a “dry” AOD is also calculated for the NAAPS-RA in which the hygroscopic growth factor is not applied.

For this work, the NAAPS-RA v1.0 AOD fields and the NAVGEM humidity fields used in generating the NAAPS-RA are extracted for the full 16 year dataset (2003-2019). NAVGEM humidity fields were integrated vertically to generate model-predicted PW fields and both the PW and AOD fields were averaged on a daily basis. Additionally, “dry” AOD fields were calculated for the NAAPS-RA and likewise, averaged on a daily basis.

## 2.2 AOD and PW Relationship Analysis:

### 2.2.1 Correlation Analysis

As a first step in understanding the relationship between aerosol and water vapor in the AERONET data record, correlations (Pearson correlation coefficients) are calculated at each AERONET site with a minimum of 100 data points. The correlations are calculated between the daily-averaged AOD (675nm) and PW datasets seasonally (December-January-February (DJF), March-April-May (MAM), June-July-August (JJA), September-October-November (SON)). This analysis is used to identify when and where relationships exist between AOD and PW in the data record and the strength of the relationship. In order to provide global context to the AERONET AOD and PW correlations, the same analysis was conducted using the NAAPS 16-year v1.0 reanalysis dataset. The seasonal reanalysis correlations were calculated in a similar manner as the AERONET data, using daily-averaged model-generated AOD and PW values. The model-generated values were then compared against observationally generated AERONET correlations. The correlations in both the AERONET and NAAPS-RA evaluation were tested for statistical significance at the 95% confidence level.

### 2.2.2. Slope Evaluation

In addition to the AOD and PW Pearson correlation coefficients calculated from the AERONET and NAAPS-RA datasets, the slopes of the AOD and PW relationship were calculated from the seasonal data using a Theil-Sen regression. A Theil-Sen regression is a robust method for fitting a line to sample points by choosing the median of slopes of all lines through pairs of points. Due to the use of the median slope, the Theil-Sen method is insensitive to outliers and therefore, a useful method for this analysis. With the Theil-Sen regression, a 95 % confidence interval of the Theil-Sen slope was calculated for each location and season.

### 2.2.3 Evaluation of the AOD and PW Probability Distribution



In addition to a correlation and slope analysis, the AOD and PW probability distributions were also evaluated. Given the expectation that aerosol and water vapor relationships will change depending on the air mass, seasonal correlations can obscure the presence of aerosol and water vapor relationships when air masses with an existing relationship between aerosol and water vapor occur infrequently. In this evaluation, the PW distribution associated with high AOD events, defined as having an AOD value greater than 1 standard deviation above the mean, were compared to the PW distribution for all data for a given location and season. A t-test was conducted to identify statistically significant differences in the PW distribution means for the high AOD events and all data ( $p$ -value = 0.05). This analysis was conducted seasonally (DJF, MAM, JJA, SON) using both the AERONET and the NAAPS-RA datasets.

#### 2.2.4 Vertical Evaluation of the AOD and PW Relationship

While the global and AERONET site AOD and PW evaluations as well as the studies cited in the introduction provide an understanding of the column-integrated relationship between aerosol and water vapor, an additional evaluation was conducted to look at the aerosol and water vapor relationship in different levels of the troposphere. This evaluation was conducted using the NAAPS-RA fields only, since observations of joint aerosol and water vapor vertical structure are limited. Model generated correlations were calculated for a defined boundary layer (BL), lower free troposphere (LT), mid-free troposphere (MT), and upper free troposphere (UT) region. The reanalysis total aerosol extinction and specific humidity were vertically integrated in the first 1km of the atmosphere as a representation of the boundary layer. Integration levels in the free troposphere were selected based on the sensitivities of the upper, mid-level, and lower-level geostationary water vapor channels on the NOAA Geostationary Operational Environmental Satellite (GOES) Advanced Baseline Imager (ABI) and the JMA Advanced Himawari Imager (AHI) with a goal of using these water vapor channels to further explore aerosol and water vapor relationships in future work. The selected integration levels were from 800 to 500 hPa (LT), 600 to 300 hPa (MT), and 400 to 300 hPa (UT), respectively. The vertically integrated relationships, as was done for the full column-integrated evaluation, are calculated seasonally and are used to identify if the model correlations are controlled by aerosol and water vapor in certain parts of the atmosphere. While the boundary layer is expected to be a dominant control of the signal, given the sources of both aerosol and water vapor are within the boundary layer, strong correlations within the free troposphere could indicate aerosol and water vapor relationships as a result of lifting from the surface or long-range transport which typically occurs within the free troposphere.

#### 2.2.5 Impact of Hygroscopic Growth on AOD and PW relationships

It is well documented in the literature that water uptake on aerosol particles under moist conditions impacts aerosol optical properties. Because of this, it is necessary to understand how much hygroscopic growth impacts AOD and PW relationships through covariability of PW and relative humidity. The data to evaluate this observationally is not available, therefore, the NAAPS-RA is used to evaluate the impact of the hygroscopic growth factor on model predicted correlations. As a first step in this evaluation, the correlation between PW and relative humidity was calculated by season for the previously defined vertical components of the atmosphere (boundary layer, lower/mid/upper free troposphere). In order to calculate relative humidity for each defined part of the troposphere, a saturation specific humidity was calculated in each model level using the reanalysis pressure and temperature fields



as input. Both the specific humidity and the saturation specific humidity were vertically integrated over the defined levels and the ratio of the two values was used to produce a relative humidity that conserves the amount of water vapor through the associated portion of the troposphere. This analysis gives a first look at where the covariability between PW and RH is expected to be most impactful on the AOD and PW relationship. However, given aerosol hygroscopic growth is dependent on aerosol type, the analysis was taken a step further by calculating the seasonal relationships, including correlations/slopes and the probability distribution evaluation, between dry AOD and PW. The dry AOD, in which the impact of hygroscopic growth on AOD is removed as described in the NAAPS-RA section (2.1.3), was calculated for the full dataset. The relationships using the dry AOD are compared to the standard AOD/PW results as a means to evaluate the impact of hygroscopic growth on the modeled AOD and PW relationships.

## 2.2.6 Evaluation at Individual AERONET Sites

While the previous analyses provide a global perspective on the aerosol and water vapor relationships, the relationships were also evaluated at select AERONET sites to provide a first look at what is driving the observed covariability between AOD and PW on an event level. The AERONET sites, including Tallahassee, Florida in the Southeast United States, Beijing, China in East Asia, Izana, Canary Islands off the coast of Africa, and Alta Floresta, Brazil in South America, are selected based on the strength of the observed/modeled relationships and cases are selected for different seasons that exhibited both positive and negative relationships. While this evaluation does not by any means provide a complete understanding of the drivers of these relationships across the globe, it can be used to provide some insight.

## 3.0 Results

This study is highly multi-dimensional. In order to elucidate the findings, the results are first presented as a global evaluation, which is followed by a more in-depth discussion by region, level, and accounting for the impacts of hygroscopicity. As aerosol regimes are typically seasonal in nature, all evaluations are performed for DJF-MAM-JJA-SON. Summaries of the data used in the analyses are presented in Figures 2 through 6, including: Figure 2, seasonal counts of daily-averaged AERONET AOD and PW data; Figure 3, seasonal mean AERONET and NAAPS-RA AOD and PW values; Figure 4 seasonal NAAPS-RA AOD averages by aerosol types (dust, sea salt, anthropogenic/biogenic fine, biomass burning); and Figures 5 and 6, the NAAPS-RA AOD and PW (respectively) 25th, 75th, and 90th percentiles from daily data and associated interquartile range (IQR) of by season. In regards to the AERONET analysis, only sites with a minimum of 100 data points are included, as previously discussed. Due to this constraint, some temporary sites used for field campaigns are excluded in this work.

### 3.1 Global Patterns of AOD-PW Correlation

Overall, the seasonal patterns in both AOD and PW are pretty consistent between AERONET and the NAAPS-RA (Figure 3). For example, peak AOD values in North America and Europe occur during the summer months in both datasets. Likewise, peak AOD values are found over the Sahel in winter and spring due to a combination of dry-season biomass burning and dust associated with the northeasterly Harmattan winds with shifts in peak AOD further north in summer due to increased dust activity over the Sahara. Like the Sahel, peak AOD values associated with fire activity during regional dry seasons are also found in both datasets for Central and South America, Southern Africa and



295 Southeast Asia. Boreal regions, which also exhibit seasonality due to fires in summer months, are not as well sampled  
 296 in the AERONET dataset, making it harder to see seasonal shifts in AOD. However, this seasonality is found in the  
 297 NAAPS-RA. Likewise, northward shifts in PW are seen in AERONET and the NAAPS-RA in the summer and a  
 298 southward shift in the winter months. A more in-depth discussion of the data by region is below:

To support the regional analysis visually perhaps regional maps could be put in an appendix, region by region.

- 299 1) North America: The largest number of AERONET sites are present in this region with ~180 included in the  
 300 analysis. AERONET data counts are the highest in the summer months (JJA) which also coincides with  
 301 peak mean AOD and PW values in both the AERONET and NAAPS-RA datasets (Figure 3). Summertime  
 302 peak AOD values are associated with ABF and smoke aerosol types, concentrated to the North, and a  
 303 combination of ABF and transported dust to the South (Figure 4). Despite JJA being associated with the  
 304 highest AOD values, the IQR is only around 0.1-0.2 (Figure 5). The 90th percentile AOD values in JJA for  
 305 North America are mainly associated with large smoke events, particularly originating from the Pacific  
 306 Northwest and Boreal regions (Figure 5). High AOD values are also observed in MAM months concentrated  
 307 in the Southeast United States (Figures 2 and 5), associated with smoke (originating from Central American  
 308 fires) and ABF/pollution aerosol types (Figure 5).
- 309 2) Europe: Data from ~125 AERONET sites was included in the analysis in Europe. Like the North America  
 310 region, peak AERONET data counts occur during JJA months (Figure 2). Peak AOD values are observed  
 311 during MAM and JJA (Figures 3 and 5), mainly associated with pollution in Eastern Europe, and  
 312 Mediterranean dust (Figure 4). PW values also peak during JJA (Figures 2 and 6). AOD IQR values, like  
 313 North America, are relatively small and on the order of 0.1-0.2 in JJA/MAM, with 90th percentile AOD  
 314 events in the 0.3-0.5 range.
- 315 3) East Asia: The analysis in East Asia included data from ~52 AERONET sites. AERONET data counts are  
 316 relatively consistent throughout the seasons (Figure 2). AOD values in East Asia are high throughout the year  
 317 due to the presence of pollution, concentrated to the East and dust, particularly in the spring and summer  
 318 (Figure 4). While pollution aerosol is present throughout the year, AOD values tend to be higher in the winter  
 319 months than the summer months in the NAAPS-RA (Figures 3 and 5) with the strength of the East Asian  
 320 Monsoon being a controlling factor in the spatial distribution and aerosol concentration in the region (Zhang  
 321 et al. 2010; Yan et al. 2011; Zhu et al. 2012; Mao and Liao, 2017). However, in the AERONET dataset, the  
 322 highest AOD values are observed in the summer months, consistent with the literature (Eck et al. 2005, 2018).  
 323 This discrepancy may be related to the satellite data that is assimilated in the NAAPS-RA in the summer  
 324 months. High AOD values are often misclassified as cloudy by the retrieval algorithms and subsequently  
 325 screened (Eck et al. 2018), which can contribute to low AOD biases in the model (Reid et al. 2022). The  
 326 range in AOD values is particularly large over East Asia as shown by the percentiles in Figure 5 with peak  
 327 IQR values of around 0.6-0.7 occurring during DJF.
- 328 4) South America: Data from ~44 AERONET sites was used in the analysis in South America. AERONET  
 329 data counts are the greatest during JJA and SON months, which is coincident with the highest AOD values.  
 330 This is particularly the case in SON, which is the dry season in South America when fire activity is increased.



331 The dominance of smoke aerosol is shown in the NAAPS-RA for these months (Figure 4). Extreme event  
 332 AOD values (90th percentile) and the IQR are the greatest for SON, again due to fire activity (Figure 5).

333 5) Northern Africa: Data from ~39 sites were used for evaluation in Northern Africa. Data counts are relatively  
 334 consistent across the seasons with the exception of the Banizoumbou, Niger site with approximately 1600  
 335 data points from 16 years of data during the DJF season. The AERONET and reanalysis average AOD values  
 336 for the North African Sahel region peaks in the winter and spring months (DJF, MAM) due to a combination  
 337 of dust and smoke aerosol (Figure 4). Peak Sahel AOD values coincide with the ITCZ being its most southern  
 338 position, which is shown in the PW fields (Figure 3 and 6). North Africa, particularly the Sahara, has high  
 339 AOD in the spring and summer months due to dust outbreaks with peak AOD values exceeding 1 and IQR  
 340 values in the 0.4-0.5 range (Figure 5).

341 6) Southern Africa: The analysis in Southern Africa included data from ~30 AERONET sites. AERONET data  
 342 counts are pretty consistent throughout the year, however, there are less sites available for analysis during  
 343 the DJF months. AOD values in Southern Africa are the highest in JJA and SON which is coincident with  
 344 peak fire activity in the region.

345 7) Arabian Peninsula: AERONET data counts from ~20 sites are consistent across the seasons in this region.  
 346 While dust emissions are present through the year, peak dust activity occurs in the summer months as shown  
 347 in the AERONET and NAAPS-RA AOD mean and percentile values (Figures 3 and 5).

348 8) India: The number of AERONET sites was ~20 in India with locations concentrated towards the North for  
 349 sampling the Indo Gangetic Plain in which pollution dominated AOD is present throughout the year, with  
 350 peak AOD values exceeding 1 during all seasons (Figure 3-5). Dust aerosol from the Thar Desert and the  
 351 Arabian Peninsula are transported to western India, particularly in the MAM and JJA seasons, while smoke  
 352 aerosol contributes to AOD in eastern India in MAM. AOD and PW are heavily influenced by the summer  
 353 monsoon season in which peak PW is observed (Figures 3 and 6).

354 9) Southeast Asia: Data from ~21 sites was available for the analysis in Southeast Asia. The number sites used  
 355 is greatest in the spring (Figure 2), coincident with the Peninsular Southeast Asia fire season in which peak  
 356 AOD values exceed 1 and large IQR values are present (Figure 5). Peak AOD values shift towards Insular  
 357 Southeast Asia during the SON months in which fire activity increases. Pollution is also present throughout  
 358 the year.

359 Regressions of AOD and PW for the daily data by season, including correlation coefficients and slopes, and the  
 360 statistically significant difference in mean PW between the distribution associated with high AOD events only and the  
 361 full PW distribution for both the NAAPS-RA and AERONET daily data are presented in Figure 7 with confidence  
 362 intervals on the Theil-Sen slopes shown in Figure 8. Red regions/sites indicate a positive correlation in which higher  
 363 PW is associated with higher AOD values and blue regions indicate a negative relationship in which lower PW is  
 364 associated with high AOD values. For all evaluations in Figure 7, the predominant signal is positive (ie. red) in both  
 365 the AERONET observations and the NAAPS-RA with the strongest correlations varying by season, and/or aerosol  
 366 regime. In the AERONET dataset, the strongest positive correlations are summarized in Tables 1-4 for DJF, MAM,  
 367 JJA, and SON, respectively. Also included are NAAPS-RA values for these sites as a means of comparison. For winter





months (DJF), the strongest positive correlations ( $>0.6$ ) occur at sites in the Southeast United States, East Asia and select sites in the Middle East such as Dhadnah, UAE (Table 1). In the spring months (MAM), dominant positive relationships occur at mostly Eastern United States sites and the Nainital site in India (Table 2). Southern Africa sites associated with smoke aerosol, Eastern European sites, and select sites in the Eastern United States have the strongest positive correlations in the summer months (JJA) (Table 3, Figure 7). In the fall (SON), AERONET positive correlations are strongest for the Eastern United States, select European sites as well as a site at Dhadnah, United Arab Emirates.

The NAAPS-RA daily correlations (Figure 7) within seasonal aggregates indicate similar but not identical spatial patterns relative to the AERONET dataset. The dominant positive correlation regions include the Eastern/Southeastern United States as is found in AERONET. Likewise, stronger European AOD and PW correlations are found in the summer months, in Eastern Asia in the winter season, and the Middle East in the fall. The NAAPS-RA results are helpful in that it provides a more complete perspective on the AOD and PW relationships. In addition to strong positive correlations in Southeast United States and East Asia during DJF, the NAAPS-RA also indicates strong positive correlations in parts of Southwest Asia (Iran/Afghanistan/Pakistan), India, South America, and Southern Africa, which are minimally if not at all sampled by AERONET. The spatial extent of the observationally-sampled relationships can also be seen. For example in MAM, the AERONET correlation at the Tamanrasset site in Algeria is 0.55 with a consistent NAAPS-RA correlation of 0.53. In the reanalysis, the correlations, greater than 0.5, extend to the east of Tamanrasset. Likewise, the spatial extent of correlations for maritime regions can be seen in the reanalysis, where AERONET sites are rare. In JJA months, correlations at the Dahkla site in Morocco are 0.45 in the AERONET dataset. Although the NAAPS-RA correlation at Dahkla is weaker ( $R=0.31$ ), the positive relationship observed in both datasets on the West coast of Africa can be seen extending out into the Atlantic ocean in the reanalysis, consistent with dust transport pathways. Correlations associated with aerosol transport are also seen in Southern Africa in the reanalysis, extending out into the ocean.

Although positive correlations are dominant throughout the world, negative correlations were also identified in both the AERONET and NAAPS-RA datasets from daily data. In the AERONET dataset, negative correlations are limited to the tropic/subtropics with negatively correlated regions mostly associated with biomass burning. The strongest negative correlations in the AERONET dataset are shown in Tables 1-4 with NAAPS-RA values shown for comparison. During all seasons, negative correlations are found in the Sahel region in both AERONET and the NAAPS-RA with the negative relationships extending further northwards in the spring and summer months. This results in an exceptionally strong dipole between Saharan and Sahelian outflow and is likely related to shifts in the ITCZ. This points to aerosol sources (biomass burning and dust) and scavenging as a cause of the negative AOD and PW relationship. The NAAPS-RA shows these negative correlations extending into the Atlantic Ocean with seasonally dependent differences. Negative correlations extend into the Caribbean in JJA and to northern parts of South America in MAM, consistent with seasonal transport pathways. Other negative correlation regions include Southeast Asia, South America, and Southern Africa. For these regions, the strongest negative correlations are associated with the respective dry, burning seasons. For example, negative correlations are strongest in Peninsular Southeast Asia in



MAM and in Insular Southeast Asia and South America in SON. In these cases, negative AOD and PW relationships are likely a result of higher aerosol emission occurring under dry conditions, which lead to more fire activity. Southern Africa is an exception during JJA, in which smoke aerosol is dominant (Figure 4). However, this is consistent with previous studies which have found elevated free tropospheric water vapor levels associated with Southern African smoke events (Adebisi et al. 2015; Pistone et al. 2021). Correlations in both AERONET and the NAAPS-RA are positive in JJA and negative in MAM and SON when smoke aerosol is also present, but not at its peak. One of the largest AERONET negative correlations occurs at the Jomsom, Nepal site in JJA with a value of -0.65 (Table 3), although nearby sites show small or statistically insignificant correlations. The Jomson site is located at 2825 meters with maximum PW values around 2 while the nearby Pokhara site is 2000 meters lower in altitude with maximum PW values around 5, therefore, Jomson is likely a regional outlier due to altitude effects. For Jomsom and the surrounding regions, the NAAPS-RA indicates no statistically significant correlation. While NAAPS and AERONET are in general agreement in the locations of negative correlations, this discrepancy is likely related to meso or small scale features that are not captured in a global, 1 degree model.

That is true, particularly for mountainous sites where the difference in model orography and the actual height of the station can be large.

417

### 3.2 Consistency between AERONET and NAAPS-RA

While the global plots of AERONET and NAAPS-RA AOD and PW relationships give a sense of spatial agreement, a scatterplot comparison of the quantitative values generated from the two datasets are used to take a closer look at the consistency between the observed and predicted relationships. A seasonal comparison of AERONET and NAAPS-RA regressions is shown as a scatterplot in Figure 9, including site by site a) correlations; b) Theil-Sen slopes; and c) the PW mean difference for high AOD events. In addition to the three scatterplot comparisons, all locations for which the sign of the AOD and PW relationships differed between the AERONET and the NAAPS-RA datasets were identified. For these identified sites, the distribution of AERONET correlations are plotted by season in Figure 9d. This is included as a means to examine the strength of the observed AOD/PW relationship under conditions when the datasets disagree. Overall, the observations and model are in general agreement in the sign of the correlations (Figure 9a) with similar results found for the Theil-Sen slope and the PW mean differences for high AOD events (Figure 9b,c). Differences in the sign of the correlation are found for 15.5, 9.5, 10.2, 10.1% of analyzed AERONET sites for the DJF, MAM, JJA, and SON months, respectively. For all seasons except JJA, these differences are mostly associated with a negative correlation in the AERONET data and a positive value in the NAAPS-RA. Differences in correlation sign occur for sites in which the AERONET-generated correlations are weak, mostly falling below 0.20 (Figure 9d), with the exception of the Jomsom AERONET site in JJA in which AERONET indicated a strong negative correlation and the reanalysis had a slight positive, but statistically insignificant relationship as previously discussed. For the strongest correlation sites, AERONET and NAAPS are in good agreement in DJF and MAM (Tables 1 and 2). For JJA and SON, NAAPS-RA has a tendency to produce weaker correlations relative to AERONET (Tables 3 and 4). Some differences are expected given that the event sampling is different between the AERONET observations and the 16-year NAAPS-RA. However, the overall agreement in the correlations between the two datasets provides some confidence in the NAAPS-RA for generating regionally and seasonally varying AOD and PW relationships on a global scale.



### 3.3 Slope Evaluation

With the consistency between AERONET and NAAPS-RA established, a more thorough evaluation of the strength of the slope of AOD-PW relationship has been conducted. As previously discussed, the AOD and PW relationship in both the AERONET and NAAPS-RA datasets were quantified using a Theil-Sen regression in order to fit a slope to the change in AOD per unit cm PW (Figures 7 and 8). Examples of NAAPS-RA and AERONET Theil-Sen fittings for eight AERONET sites scattered over the globe, each with their own unique aerosol environment are shown in Figure 10. Included are positive and negative correlation examples shown for each season (DJF: Beijing China and Lamto, Ivory Coast; MAM-Houston Texas and Ilorin Nigeria; JJA-Helsinki, Finland and Dakar Senegal; and SON-Dhadnah UAE and Palangkaraya, Indonesia) with the selected sites having some of the strongest correlations for the respective seasons in the AERONET and NAAPS-RA datasets (Tables 1-4). Good agreement is shown between the NAAPS-RA and AERONET-generated Theil-Sen slopes at the selected sites with the largest differences occurring at the Lamto and Palangkaraya sites in which relatively less AERONET observations are available. These fittings are calculated for each grid and AERONET site and are used to generate the results in Figures 7 and 8. The examples in Figure 10 show the insensitivity of the Theil-Sen regression to outliers, while the correlation coefficient is quite sensitive to such values. Beijing in DJF exhibits a large change in AOD with PW, as high AOD events are more frequent at this location (Figures 5 and 10). However, places like Houston, Helsinki and Dhadnah have relatively smaller Theil-Sen slopes as high AOD events, with a value around 1, occur less frequently and do not influence the slope. For these locations, the range of frequently observed AOD events is much smaller (Figures 5 and 10), resulting in small changes in AOD with PW. Although there is certainly scatter in the data points in Figure 10, statistically significant trends exist. The scatter in the data points occurs more so at negative correlation locations (Figure 10), resulting in smaller correlation coefficients. While the relationships for both positive and negatively correlated locations are statistically significant and the Theil-Sen regression gives an overall trend, the scatter indicates differences in AOD and PW relationships will occur from day to day. This is expected as the AOD-PW relationship is based on a combination of transport covariance and local meteorology-source relationships.

The global and seasonal pattern in the positive and negative Theil-Sen slopes are consistent with the correlation analysis results (Figures 7 and 8). The biggest Theil-Sen slopes tend to occur where larger IQR ranges are present (Figure 5), as was shown for the Beijing Theil-Sen slope example in Figure 10. The largest slopes in both datasets are centered on Beijing in the DJF months with values exceeding  $1\text{ cm}^{-1}$ . Beijing consistently has some of the largest positive changes in AOD with PW in the AERONET dataset for all seasons with values, including 95% confidence intervals, of  $1.1(1.0\text{-}1.2)$ ,  $0.35(0.32\text{-}0.38)$ ,  $0.46(0.43\text{-}0.51)$ , and  $0.26(0.22\text{-}0.3)$   $\text{cm}^{-1}$  for DJF, MAM, JJA, and SON, respectively. The NAAPS-RA is largely consistent with AERONET for the DJF and MAM months with corresponding values of  $1.13(1.08\text{-}1.18)$ , and  $0.31(0.29\text{-}0.33)$   $\text{cm}^{-1}$ . Less sensitivity to PW is found in the reanalysis for JJA and SON with corresponding values at Beijing of  $0.13(0.11\text{-}0.14)$ , and  $0.18(0.17\text{-}0.20)$   $\text{cm}^{-1}$ . This is likely due to an underestimation of haze formation within NAAPS, as with other global models (e.g., Sessions et al., 2015; Xian et al., 2019) and also possibly due to the underestimation of AOD in summer from NAAPS due to a low AOD bias in the assimilated satellite AOD datasets in the East Asia region (Eck et al., 2018). Large positive changes in AOD with PW extend through Asia, the Middle East, and Northern Africa, all regions impacted by high AOD events. As is the case



in the correlation results, the strong dipole in slopes is clear over North Africa with positive slopes to the North and negative slopes in the southern Sahel region. Likewise, negative slopes are mainly associated with burning regions with the exception of Southern Africa in JJA. Statistically significant correlations and slopes at high latitudes, particularly Antarctica, indicate aerosol/water vapor transport in the model since local sources are limited, although AOD and PW values are low (Figures 5 and 6).

Recall the scatterplot comparison of AERONET and NAAPS generated changes in AOD with PW is shown in Figure 9(b). Again, there is generally good agreement between the datasets, consistent with the correlation comparison. The signs of the slopes are the same with the exception of 14.6, 9.2, 12.3, and 8.1% of sites for DJF, MAM, JJA, and SON, respectively. Sites where differences in sign are observed have weak correlations (Figure 8d). The NAAPS-RA has a tendency to under-predict negative changes in AOD with PW relative to AERONET for SON months where peak negative slopes are generated from AERONET. This is also shown in Table 4 as well as the global maps in Figure 7 where differences can be seen, particularly in the Sahel and Southeast Asia. At the Kuching site in Borneo in SON, the AERONET generated slope is  $-0.37(-0.48 \text{ to } -0.28) \text{ cm}^{-1}$  with a reanalysis value of  $-0.11(-0.13 \text{ to } -0.09) \text{ cm}^{-1}$  likely due to strong mesoscale variability and poor constraint in biomass burning on Borneo (Reid et al., 2013; Wang et al., 2013). Additionally, this could again be due to satellite retrieval screening of smoke as cloud and NAAPS failing to simulate the highest AOD smoke events in Borneo, especially in the dry El Nino years such as 2015 (Eck et al. 2019, Shi et al. 2019). The reanalysis also tends to under predict positive slopes for JJA at the AERONET sites where the largest slopes are observed. This difference is not restricted to a particular region, but can be seen in East Asia, Africa, and Mexico City (Figure 7). As an example, the Tamanrasset site in Algeria exhibits slopes in the AERONET data of  $0.26(0.23-0.30) \text{ cm}^{-1}$  and in the reanalysis of  $0.07(0.06-0.08)$ . Likewise, at the Lubango site in Angola, the slope is  $0.27(0.21-0.34) \text{ cm}^{-1}$  in the AERONET data and  $0.13(0.12-0.14) \text{ cm}^{-1}$  in the reanalysis. The Tamanrasset site is at 1377 meters altitude in the Ahaggar Mountains which is significantly higher than the surrounding terrain in the Saharan Desert. The Lubango site in Angola is at 2047 meters, also higher than a portion of the surrounding terrain. **This terrain/altitude influence is likely a factor in the discrepancies.** The differences in slopes for JJA are also shown in Table 3.

Definitely. It is hard to make meaningful model-obs comparisons at mountain sites due to coarse model resolution and difference in orography.

### 3.4 Evaluation of the AOD and PW Probability Distribution

While the correlation and slope evaluation is used to define a seasonal AOD and PW relationship across the datasets, it is expected that variations in the aerosol and water vapor relationship will exist across air masses. As a result, a probability distribution evaluation is another useful way to examine the data. The seasonal evaluation of the probability distributions is included in Figure 7, below the correlation and slope results. The plots show the statistically significant difference in the mean for the PW distribution associated with high AOD events (AOD values more than 1 standard deviation above the mean) and the full PW distribution. Red regions/sites indicate that the PW mean for high AOD events is statistically higher than the full distribution mean (i.e. higher moisture levels). Blue regions/sites indicate a lower PW mean for high AOD events (i.e. dryer conditions). Regions or sites in white have no statistically significant difference. The spatial pattern in the probability distribution evaluation are similar to the correlation and slope analysis, however, the probability distribution evaluation highlights different regions than the previous analyses. For example,



across all seasons, larger changes in PW for high AOD events are observed in Argentina, South America, including at the CEILAP-BA (Buenos Aires, Argentina) with values of 0.88, 0.94, 1.01, and 1.00 cm for DJF, MAM, JJA, SON in the AERONET dataset and values of 0.61, 0.35, 0.95, and 0.73 cm in the NAAPS-RA dataset. This is a region that is impacted by both local pollution and transported biomass burning (Resquin et al. 2018). Larger changes in PW for high AOD events are also observed over Northern Australia during MAM, which is consistent with peak bushfire season in the region. Larger changes in PW are also found over the United States and Canada, consistent with patterns in the correlation evaluation, but with more pronounced values relative to other locations. ABF is generally the dominant aerosol type with biomass burning from Central America and Western US/Boreal Regions during the MAM and JJA seasons, respectively. Likewise, Eurasian Boreal regions associated with biomass burning activity during JJA are more pronounced in the PW distribution evaluation. The peak in values in the Southeast United States are found during the DJF season. During MAM and SON, the peak areas include most of the Eastern United States and extending into Canada and Central America. However, regions that were more pronounced in the correlation and slope evaluation, have smaller differences in mean PW for high AOD events, Beijing being a good example of this. Based on AERONET, the difference in mean PW at Beijing is 0.21cm while the difference is 0.35cm in the NAAPS-RA for DJF when the strongest correlations and largest slopes were found. However, sites like Stennis, Mississippi (Table 1) which had a much smaller slope than Beijing (0.04cm<sup>-1</sup> compared to 1.1cm<sup>-1</sup>) have a much larger difference in mean PW with the AERONET value of 1.08cm and the NAAPS value of 1.16cm. This is because the probability distribution evaluation is taking into account those infrequent, outlier events that don't affect the Theil-Sen slopes. Locations where the IQR is relatively small, such as the United States, Europe, Australia, and parts of South America and Southern Africa have greater differences in mean PW, despite having small Theil-Sen slopes, due to the impact of outlier events. For many of these regions, the outliers are associated with biomass burning, indicating that PW is a useful tracer for such events.

Like the correlation and slope evaluation, a comparison of AERONET and NAAPS generated differences in mean PW was conducted by season. Similar to the previous two comparisons, AERONET and NAAPS are in agreement in the sign of PW difference for most locations, demonstrated by the global plots in Figure 7 and the scatterplots in Figure 8c. The % of sites that have differences in sign between the two datasets are 8.9, 6.87, 5.86, and 4.15% for DJF, MAM, JJA, and SON, respectively. These percentages are smaller than the % of sites with differences in the correlation and slope analysis. However, like the previous evaluations, most sites that exhibit sign differences between AERONET and NAAPS had weak AOD and PW relationships ( $R < 0.20$ , Figure 8d), with the exception of some outliers in which small scale features that cannot be resolved in the global model may be at play. The comparisons between AERONET and NAAPS-RA across the different evaluations indicate that NAAPS is generating AOD and PW relationships that are pretty consistent with the observational data. Although differences in magnitude are present, the direction of the relationships are very consistent, providing confidence in the use of the NAAPS-RA for further exploring the AOD and PW relationship, particularly in the vertical and accounting for hygroscopic affects.

### 3.5 Vertical Evaluation of the AOD and PW Relationship



In addition to calculating the full column-integrated AOD and PW correlations in the NAAPS-RA, the correlations were also evaluated by vertically integrating the extinction and specific humidity through previously defined pressure levels in the atmosphere that correspond to a boundary layer, lower, middle, and upper free troposphere. This evaluation was conducted seasonally, like the fully integrated analysis, with results shown in Figure 11. In addition to the global plots, histograms of the AOD and PW correlations for the full column and the vertical components of the atmosphere are shown in Figure 12. It is notable that stronger positive correlations exist when looking at limited parts of the atmosphere compared to the fully integrated column. This is most evident in the global plots for ocean regions, particularly in the Southern Hemisphere, where correlations exceeding 0.5 occur compared to the fully integrated correlations that are on the order of 0.2. This result is not unexpected given that the vertical components of the atmosphere look different depending on things like vertical mixing, a local aerosol and water vapor source compared to a long-range transport event, the relative humidity profile etc. Additionally, some regions exhibit stronger correlations in certain portions of the atmosphere. For example, dust dominated regions such as the Sahara, Arabian Peninsula and the Gobi and Taklimakan deserts have the strongest correlations in the mid FT. This is higher up in the atmosphere than expected, given for example, studies have shown East Asian dust heights to range from 1.9 to 3.1 km (Liu et al. 2019) and the typical description of the Saharan Air Layer (SAL) includes dust-laden air between approximately 850 and 500 hPa (Karyampudi et al. 1999) with several other studies identifying Saharan dust up to ~5 km for summertime dust transport (Mortier et al. 2016, Veselovskii et al. 2016, Tesche et al. 2011). This indicates that the model may be transporting too much dust aerosol and water vapor higher into the atmosphere and this transport is well correlated. Correlations over North America and Eastern Europe are strongest in the BL to lower FT. Wintertime correlations over East Asia/Beijing are pretty consistent throughout the column. Negative correlation regions associated with smoke aerosol, including the Sahel, Southern Africa, and Southeast Asia have the strongest correlations in the lower FT and largely disappear beyond this point. The shift in correlations with vertical location are also evident in the histograms (Figure 12) when compared to the full column distribution. This is particularly the case for the lower and mid free troposphere where the number of grids with correlations greater than 0.5 increase. Additionally, the shift of the correlations to mostly positive can be seen in the mid and upper free troposphere histograms.

### 3.6 Impact of Hygroscopic Growth on AOD and PW relationships

The final consideration in this work is hygroscopicity. Although the effects of clouds on the AOD and PW relationship is also important to understand, this effect cannot be investigated using NAAPS since the model does not account for the processing of aerosol in cloud droplet, rapid gas-to-particle conversion in cloud droplets or the high RH halo in the immediate vicinity of clouds. However, this should be considered in follow-on work. While relationships between AOD and PW have been demonstrated, this signal can be either from co-transport or a confounding relationship between enhanced PW and RH. The correlation between RH and PW is shown in Figure 13 by season and for the boundary layer and parts of the free troposphere. The largest spatial variations in the PW and RH correlation occur in the boundary layer, as anticipated, with strong correlations found over Africa, extending into the Indian Ocean/India, located further North during JJA and further South during DJF and similar patterns during MAM and SON. Other regions of high correlation in the boundary layer include off the coast of South America, parts of Australia, and limited

Is this supported by vertically resolved observations such as CALIPSO for aerosol extinction and MW sounders for PW? This is beyond the scope of this paper, but could be interesting for a future study.





586 locations in the tropical oceans. Beyond the boundary layer, the overall patterns are generally consistent throughout  
 587 the vertical column with strong correlations in the subtropics and tropics ( $>0.9$ ) with some variations on the extent by  
 588 season. In JJA for example, this high correlation region extends further north while in DJF the high correlation region  
 589 extends further in the Southern hemisphere. In this highly correlated region, hygroscopic growth is expected to be a  
 590 significant driver in AOD and PW relationships when dust is not the dominant aerosol type. RH and PW correlations  
 591 are higher over ocean regions than over land in the northern hemisphere, which should be impactful for sea salt aerosol  
 592 and PW correlations. The impact of the RH and PW correlations on the AOD and PW relationship are shown in  
 593 calculated seasonal relationships between “dry” AOD, which excludes the impact of hygroscopic growth, and PW in  
 594 the NAAPS-RA in Figure 14. This figure includes the correlations, the slope of the “dry” AOD and PW relationship,  
 595 and the statistically significant difference in mean PW for high “dry” AOD events. The removal of hygroscopic growth  
 596 from the AOD calculation had the following outcomes on the resulting correlations: 1) the previously positive  
 597 correlation was reduced in magnitude 2) the previously negative correlation coefficient became more negative 3) the  
 598 sign of the correlation flipped from positive to negative and 4) little to no change in the correlation. Regions such as  
 599 the Eastern United States and Europe fall into the first category where positive AOD and PW correlations are found  
 600 for all seasons, but the correlation coefficient is greatly reduced. For the Eastern United States, peak correlation  
 601 coefficients were in the approximately 0.6-0.7 range with hygroscopic growth and fell below 0.5 without it. This is  
 602 especially true in JJA when RH and PW correlations are the strongest. Likewise, positive correlations in Europe are  
 603 still present, but weakened. In these cases, hygroscopic growth amplifies an existing positive relationship that is  
 604 somewhat weak when evaluating seasonal data by correlation. In regards to the second category, this corresponds to  
 605 regions dominated by smoke aerosol that previously exhibited negative AOD and PW relationships, such as Peninsular  
 606 Southeast Asia during the MAM months and Insular Southeast Asia during the SON months. Additionally, increases  
 607 in negative correlations are found for aerosol transport from Asia across the Pacific Ocean. In these cases, hygroscopic  
 608 growth reduces an existing negative relationship between aerosol and water vapor. Ocean regions mostly account for  
 609 the third category where the correlation flipped from a weak positive to negative value. Regions that are dominated  
 610 by dust, including the Sahara and Arabian Peninsula, fell into the fourth category as there is no hygroscopic growth  
 611 for dust in NAAPS.

612  
 613 In regards to the slope of “dry” AOD and PW, the same categories apply with similar spatial patterns relative to the  
 614 correlation analysis. Additionally, the same is true when examining the difference in mean PW for high “dry” AOD  
 615 cases. In this case, it is found that either: 1) an increase in PW is still statistically significant, but the difference in  
 616 mean PW is much less 2) a decrease in PW for high “dry” AOD cases is still statistically significant with a larger  
 617 decrease when not considering hygroscopic growth 3) the sign of the difference flipped from an increase in PW to a  
 618 decrease or the difference became statistically insignificant and 4) the PW difference did not change much due to dust  
 619 dominated conditions. While the modeled differences in PW are statistically significant when excluding hygroscopic  
 620 growth, they are small, with peak differences on the order of a few millimeters. The results here indicate that  
 621 hygroscopic growth of aerosol plays an important role in the AOD and PW relationship. While PW is still a good  
 622 tracer for AOD as shown in this work, it should be kept in mind that there is a difference in water vapor as a tracer for

In urban areas this is  
 extremely important as  
 AOD is not a good proxy  
 for dry PM.



AOD and for aerosol mass. It is expected that the relationship between “dry” AOD and PW would be a closer representation of the dry aerosol mass to PW relationship.

### 3.7 Discussion through Example Cases at Individual AERONET Sites

In order to further understand regional differences in observed AOD and PW relationships, individual sites in which strong AOD and PW relationships were identified and had several years of observational data available were selected for further analysis. These sites included: 1) Tallahassee, Florida for Southeast US pollution (Figure 15); 2) Beijing, China for Asian haze and dust (Figure 16); 3) Izana, Canary Islands for Saharan dust (Figure 17); and Alta Floresta, Brazil for South American biomass burning (Figure 18). For the four identified AERONET sites, the daily-averaged AOD and PW timeseries are examined for seasons in which correlations were found to be strong. This includes DJF for the Tallahassee and Beijing sites and JJA for Izana. At these sites, the identified relationships between AOD and PW were positive. The Alta Floresta site, which exhibited negative AOD and PW relationships in the presented results, is further examined for the SON biomass burning season. The daily-averaged data are included since this is what was analyzed in the previous analyses. Additionally, the AERONET data, without any averaging, is further examined for individual cases from the site-specific timeseries for which peaks in AOD and/or PW were found. NAAPS-RA AOD and PW fields are also shown for the selected cases (Figures 15-18).

At the Tallahassee site, the predominant aerosol type is ABF/pollution and although AOD values are generally low during DJF (mean values in the 0.1-0.2 range, Figure 3), strong AOD and PW relationships were found with correlations of 0.74 in the AERONET dataset and 0.66 in the NAAPS-RA with PW mean differences around 1cm for high AOD events (Table 1). The daily-averaged AOD and PW timeseries for the 2018-2019 DJF season are shown in Figure 15a. The timeseries indicates, consistent with the correlation analysis, that the daily-average AOD and PW generally move together. There are several joint peaks in AOD and PW that occur during the time period and three selected cases are examined further, including 1/1/2019, 2/7/2019, and 2/17/2019, with these events identified in the Figure15a timeseries using red arrows. The AERONET AOD and PW timeseries for these three cases are shown in Figures 15b-d, respectively. The 2/17 case has the least data points available, making it harder to evaluate diurnal changes in AOD and PW, however, the 1/1 and 2/7 cases have a good number of data points throughout the afternoon and later into the evening. For these two cases in particular, the changes in AOD and PW throughout the day are generally consistent with each other, indicating that the AOD and PW relationships can extend to sub-daily timescales. AOD and PW plots for the three identified cases are shown from the NAAPS-RA in Figure 15e as a means to assess the types of aerosol events that are impacting Tallahassee when coordinated peaks in AOD and PW are observed. For all three cases, coincident transport of AOD and PW is observed in the reanalysis fields, associated with a frontal system. This type of frontal transport was commonly found for events in which coincident PW and AOD peaks are observed at Tallahassee. As the DJF season in the Southeast United States has significant frontal activity, this is likely an important factor in enhanced AOD/PW relationships during this season.

Beijing is an urban site that commonly experiences high AOD levels related to pollution as well as transported dust and smoke events. Wintertime events are notorious for exhibiting some of the worst air quality in the world for a major population center (e.g., Wang et al., 2014; Gao et al., 2016; Zhang et al., 2018). Additionally, Beijing has the benefit



of a long AERONET data record with measurements dating back to 2001. Like Tallahassee, the AOD and PW timeseries at Beijing is evaluated for the 2018-2019 DJF season (Figure 16) with strong positive relationships identified in both the AERONET and NAAPS datasets with correlations of 0.71 and 0.76, respectively, and the change in AOD with PW exceeding  $1\text{cm}^{-1}$  (Table 1). As indicated in Figure 4, ABF/pollution is the dominant aerosol type with some dust present with much higher AOD values observed at this location (Figures 3 and 5). In East Asia, pollution build-up often occurs under stagnant weather conditions where a stable atmosphere leads to limited vertical mixing (Wang et al. 2014, Li et al. 2019) with the monsoon being an important factor in determining synoptic conditions. In particular, the East Asian Winter Monsoon (EAWM) has been shown to be a controlling factor in aerosol concentrations during the winter season (Li et al. 2016; Jeong et al. 2017). With a strong EAWM, reduced aerosol concentration occur over northern East Asia, including Beijing, due to stronger northerly winds. In weaker EAWM years, increased aerosol concentrations occur in the north due to weakened winds and more stagnant conditions. The daily-averaged AERONET AOD and PW timeseries for 2018-2019 DJF is shown in Figure 16a. Consistent with the previously presented evaluations, the daily-average time series for this particular DJF time period are well correlated with AOD and PW moving up and down together. As was done for the Tallahassee site, several peaks in AOD and PW were selected for further evaluation and are highlighted with red arrows on Figure 16a, including the peak on 1/3 and its subsequent decrease on 1/4/19, and the peak on 12/20/18 and its subsequent decrease on 12/21/18. The non-averaged AERONET AOD and PW timeseries for these two cases are shown in Figure 16b and c, respectively, with a zoomed in view of 12/21 on Figure 16d. For both of these events, high AOD from ABF/pollution and PW values are observed with a subsequent dropoff the following day, which are well coordinated in the full dataset. The closer look at the data on 12/21/18 (16d), like the previous Tallahassee examples, shows consistent movement between the measured AOD and PW indicating the presence of correlations on short timescales. For both of these events, the NAAPS-RA AOD and PW fields are shown for both the peak and subsequent dropoff in Figure 16e. The movement of the large-scale air mass can be seen in both the AOD and PW fields. For the 1/3/19-1/4/19 event, NAVGEM meteorological fields indicate weakened northerly winds due to a region of high pressure over the eastern portion of the continent, leading to stagnant conditions at the surface in Beijing and local pollution and water vapor build-up. On the following day, the high pressure system moved eastward. As a result, the Siberian High northerlies were no longer suppressed and a more typical wintertime circulation resumes with the winds jointly pushing the aerosol and water vapor southward and away from Beijing. For the 12/20/18-12/21/18 case, extensive multi-level cloud cover can be seen in both MODIS Terra and Aqua images on 12/20, indicating that this may be a case where clouds may have played a role in gas-to-particle conversion in the polluted air and/or enhanced particle humidification in the high RH fields associated the clouds, consistent with the findings of Eck et al. (2018). As the air mass moves on 12/21, a joint reduction in both AOD and PW is observed at Beijing, demonstrating the impact of large scale transport. Thus in the Beijing case, the overall regional weather patterns are an important factor in the AOD and PW relationship.

The third site that is examined is Izana in the Canary Islands (Figure 17). The Izana site, which is located approximately 300km west of the African coast, is particularly useful for evaluating aerosol and water vapor relationships for free tropospheric dust. It has also been noted in the community that against a Saharan air layer free



subsidence regime, the infrared signals of Saharan Air Layer dust are quite small relative to co-transported water vapor (Gutleben et al., 2019; Ryder, 2021; Barreto et al., 2022). Nevertheless, forecasters find the water vapor signal useful in tracking dust events (Kuciauskas et al., 2018). Izana is a mountain site located at approximately 2400m, above a strong subtropical temperature inversion layer which makes it ideal for monitoring free tropospheric plumes. In the summer months, frequent and intense Saharan air mass outbreaks in the subtropical free troposphere impact the site. Particularly large AOD dust storms were observed transporting Saharan dust across the Atlantic in the summer of 2020, including the so called “Godzilla” dust event in June that has been examined in detail in previous studies (Francis et al. 2020). As a result, this time period was evaluated in further detail at Izana with a focus on several dust events. In the analysis conducted in this work, positive relationships between AOD and PW were found in both the AERONET and NAAPS datasets at Izana during the JJA season with the AERONET dataset having a correlation of 0.66 and the NAAPS-RA indicating a weaker correlation of 0.48 (Table 3). As noted for other sites, this difference may be due to altitude effects at the Izana site which may not be captured in NAAPS. The daily-average AOD and PW timeseries for the 2020 JJA season at Izana are shown in Figure 17a. The AOD and PW are pretty well correlated, although there are PW peaks present without the presence of aerosol. As sources of aerosol and water vapor are different, this is not unexpected. Three of the peak from the timeseries as indicated by the red arrows were selected for further evaluation, including 6/14/20, 7/18/20, and 7/31/20 with timeseries shown in Figures 17b-d, respectively. As was shown for the previous pollution cases, the AOD and PW are well correlated in the non-averaged dataset showing the presence of correlations for dust events on timescales less than a day. The NAAPS-RA AOD and PW fields are shown for the 6/14/20 case in addition to the associated dropoff of both AOD and PW on 6/18/20, as well as for the 7/18/20 and 7/31/20 events in Figure 17e. For the 6/14/20 case, CALIPSO indicates dust tops near Izana at around 5km. A cutoff low was present to the northwest of Africa and a subtropical high over the Western coast of Africa which resulted in increased dust generation and recirculation. The southwesterly winds transport the dust to Izana on June 14 and at the same time, moist ocean air shown by the PW fields is transported to Izana as well, resulting in a spike in both AOD and PW at the AERONET site. On June 18, the moisture and dust begin pushing south and west across the Atlantic, resulting in decreases in AOD and PW at the same time at Izana. Similar examples of dust and water vapor cotransport are shown for the 7/18/20 and 7/31/20 cases. These results are consistent with previous studies which have indicated enhanced water vapor mixing ratios associated with the dust in Saharan Air Layer events (Marsham et al. 2008, Jung et al. 2013, Kanitz et al. 2014). Thus, Izana is a good example of subtropical free tropospheric co-transport of water vapor and dust.

725

The final site evaluated was Alta Floresta, Brazil for the 2019 SON season, when biomass burning is the dominant aerosol type. Here, there is a strong seasonal dependency: drier seasonal conditions are associated with a July-October biomass burning season. At this site and other regions of biomass burning, negative correlations between AOD and PW were identified in the presented evaluations. For Alta Floresta, SON correlations of -0.38 and -0.47 were generated from the AERONET and NAAPS-RA datasets, respectively (Table 4). The daily-average AOD and PW timeseries are shown in Figure 18a. An important thing to note about this timeseries is that a clear downward shift in the PW fields occurs during October, consistent with monthly site climatologies from AERONET (3.61cm in



September, 4.15cm in October, 4.5cm in November). As fires are associated with dry conditions, the AOD fields decrease as the water vapor increases. This shift towards wetter and decreased aerosol conditions is driving the seasonal negative correlations for biomass burning regions. However, despite this overall shift, peaks in AOD and PW are generally positively correlated. Several such cases are highlighted in the timeseries, including 9/15/19, and 9/23/19. The 9/9/19 event is also highlighted in which the daily-averaged AOD peaks and the PW is at a low. For all three cases, the AOD and PW timeseries shown in Figures b-d, show good positive correlations with AOD and PW changing in the same way throughout the day. For the 9/9/19 case, this appears to a more locally driven event with the extent of the smoke being more limited and the air being drier than the surrounding areas, suggesting a different air mass (Figure 18e). Additionally, there is much more small scale variability in the AOD and PW fields (Figure 18b). For this type of event, the daily-average PW fields might not be as good of an indicator of what is going on with AOD. For the other two cases, the NAAPS-RA plots indicate larger spatial extent of the smoke with more moisture associated with the air mass. In this case, daily-average PW is a better indicator for large scale smoke events. However, for all three smoke cases, AOD and PW are correlated on an event level. Thus, in this case the AOD-PW relationship identified in the previously presented AERONET and NAAPS-RA evaluations represents the end of the burning season with wet season onset in the middle of a “climatological season”. However, PW is a good positive indicator of AOD associated with smoke on an event level, consistent with what has previously been shown in the literature for case study evaluations.

#### 4.0 Conclusions and Implications

The relationship between AOD and PW was evaluated globally and on seasonal and daily timescales using approximately 20 years of AERONET observational data and the 16-year NAAPS-RA v1.0 model fields. As AERONET observations have small measurement uncertainties, the observational analysis provides a best estimate of the AOD and PW relationships. The observational analysis was combined with the NAAPS-RA in order to provide a complete global perspective on the AOD and PW relationship as well as to provide an avenue for further exploration, including what the likely drivers of these relationships are, what the relationships look like when taking the vertical location into account, and the impact of hygroscopic growth on the AOD and PW correlations.

The major findings of this work include:

1. Seasonal relationships between AOD and PW are present across the globe at both seasonal and daily levels. Most often AOD and PW relationships are strongly positive at seasonal to daily time scales, especially for species such as pollution and dust. Biomass burning, however, has negative seasonal relationships due to fire proclivity in dry seasons. Nevertheless, positive daily relationships are observed, associated with transport. For regions like the Sahel, negative relationships between AOD and PW were found with spatial patterns consistent with shifts in the ITCZ in which convection leads to aerosol scavenging.
2. Mid-latitude relationships between AOD and PW appear to be driven by frontal activity. While tropical/subtropical relationships are driven by seasonal monsoon activity, ITCZ, and dry season patterns.



- 767 Dust transport associated with African easterly waves and cyclones are the link between aerosol and water  
 768 vapor for the Sahara.
- 769 3. The observed correlations between the AOD and PW were stronger when evaluated by vertical level with the  
 770 strongest correlations identified in the free troposphere, consistent with large scale aerosol and water vapor  
 771 transport. The location of the strongest correlations varied by aerosol type with dust dominated regions  
 772 having the strongest correlations in the mid free troposphere and smoke dominated regions having the  
 773 strongest correlations in the lower free troposphere.
- 774 4. Hygroscopic growth of aerosol particles, which is associated with increased relative humidity and often  
 775 occurs with increasing PW, has a large influence on the observed covariability between AOD and PW,  
 776 particularly in the mid-latitudes and for non-dust aerosol species. While transport covariance between AOD  
 777 and PW is present, the imbedded RH to PW relationship is the dominant term. This indicates that PW is a  
 778 good tracer for AOD, but not necessarily aerosol mass. This is an extremely important point.
- 779 5. Covariability between AOD and PW for dust-dominated events is statistically significant and hygroscopic  
 780 growth is not an important factor.

781 Overall, this evaluation provides a global perspective on AOD and PW relationships. As has been previously  
 782 shown for individual case studies in the literature, this work reaffirms that PW is a useful tracer for aerosol  
 783 transport and such relationships are present across the globe. The seasonal AOD and PW evaluations conducted  
 784 in this work highlight regions and seasons for which AOD and PW relationships are expected to be more  
 785 prevalent. In particular, regions and seasons for which strong correlations and impacts on the PW distribution for  
 786 high AOD events are found are associated with synoptic scale aerosol events, including large-scale pollution and  
 787 smoke events over CONUS and Europe, Saharan dust events over the Atlantic, biomass burning events during  
 788 regional dry seasons in South/Central America, Africa, and Southeast Asia, and Asian dust/haze events. This is  
 789 confirmed when evaluating AOD and PW relationships on an event basis in different parts of the world in which  
 790 coincident peaks in daily-averaged AOD and PW were associated with large-scale aerosol transport events. The  
 791 vertical evaluation of the AOD and PW relationship provides further evidence that a strong contributor to the  
 792 identified relationship is synoptic scale aerosol transport in the free troposphere where the relationships were  
 793 found to be stronger than the fully integrated vertical column. These signals were present for all aerosol types  
 794 evaluated, indicating PW can be a useful tracer for AOD associated with all aerosol types as long as sources of  
 795 both and a common linking transport mechanism are present. For example, in the United States, fronts were the  
 796 linking transport mechanism while in East Asia, monsoonal patterns controlled joint transport. Likewise, dust  
 797 transport associated with African easterly waves and cyclones linked aerosol and water vapor for the Sahara.  
 798 Regions identified with strong correlations indicate the frequent presence of such synoptic scale co-transport  
 799 events while the PW distribution evaluation for high AOD events highlights regions in which such events are  
 800 present, but can be infrequent, as was the case for Boreal smoke events in summertime.

801 This work provides a first step in understanding the important aerosol and water vapor relationship on a global  
 802 scale. While aerosol and water vapor relationships will vary from air mass to air mass, this analysis provides an



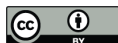

803 understanding of where and when AOD and PW relationships are expected to be of importance and can be  
804 exploited in 1) using water vapor as an aerosol tracer 2) in data assimilation applications and 3) for radiative  
805 transfer studies in which collocated aerosol and water vapor can impact results. While this analysis provides a  
806 quantitative estimate of the aerosol and water vapor relationship in a big picture sense, the next step is to further  
807 understand the aerosol and water vapor relationships on an event level. This is particularly important for data  
808 assimilation in which an understanding of how this relationship temporally and spatially evolves for individual  
809 air masses needs to be developed. As such, a follow-on study will be conducted to investigate the evolution of  
810 aerosol and water vapor in space and time on an event level with a focus on specific regions identified in this  
811 work.

#### 812 **Code and data availability**

813 AERONET observations are available for download through <https://aeronet.gsfc.nasa.gov/> and the NAAPS  
814 reanalysis data in NetCDF format can be downloaded through The US Global Ocean Data Assimilation  
815 Experiment (GODAE) server (<https://usgodae.org/>).

#### 816 **Author contributions**

817 Authors Juli Rubin and Jeffrey Reid planned the analysis while Juli Rubin conducted the majority of the analyses  
818 presented in this work. Peng Xian provided the NAAPS-RA dataset and provided help in using the data. Jeffrey  
819 Reid, Juli Rubin, Christopher Selman and Thomas Eck helped in interpreting the results of the study with Chris  
820 Selman focused on the meteorological aspect and Thomas Eck providing important feedback on the evaluation  
821 using AERONET data.

#### 822 **Competing interests**

823 The peer-review process was guided by an independent editor, and the authors have no other competing interests  
824 to declare.

825

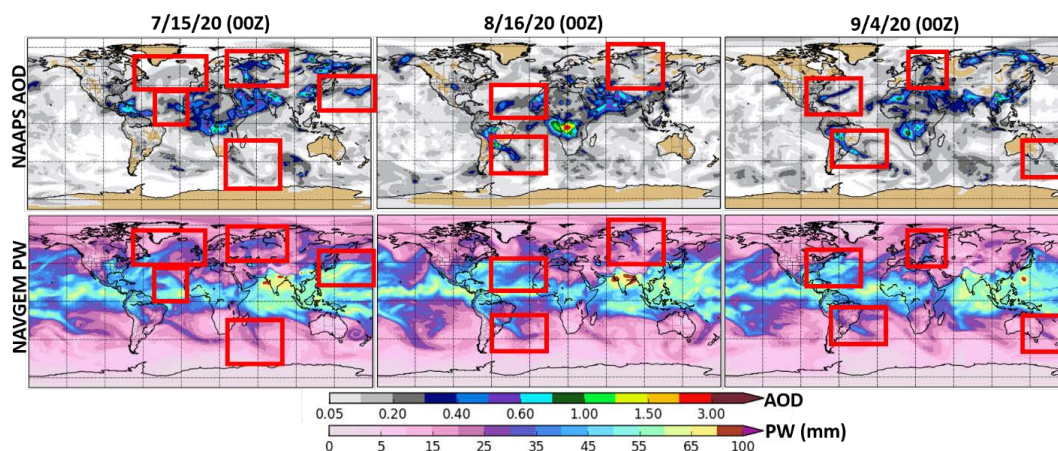

Figure 1. Examples of NAAPS AOD and NAVGEM PW forecasts in which similar synoptic scale transport patterns are found, particularly in the mid-latitudes. Aerosol and water vapor features with similar transport patterns are highlighted in matching red boxes in the AOD and PW plots. These types of co-transport events of both positive and negative correlation are found in forecasts on a daily basis.

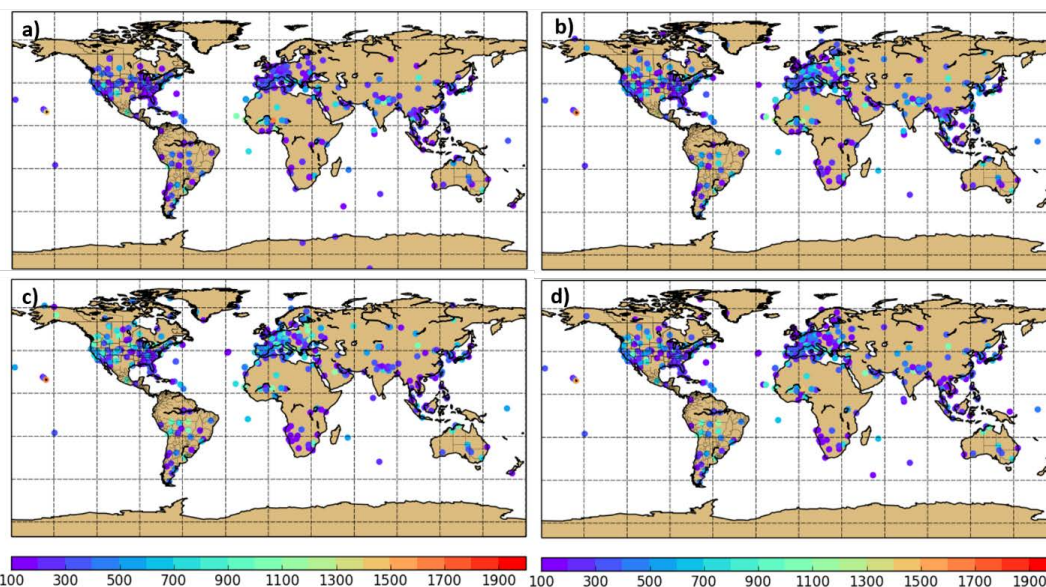

Figure 2. Count of daily-averaged AERONET AOD and PW data points by season: a) DJF b) MAM c) JJA d) SON. Only sites with at least 100 points are shown.

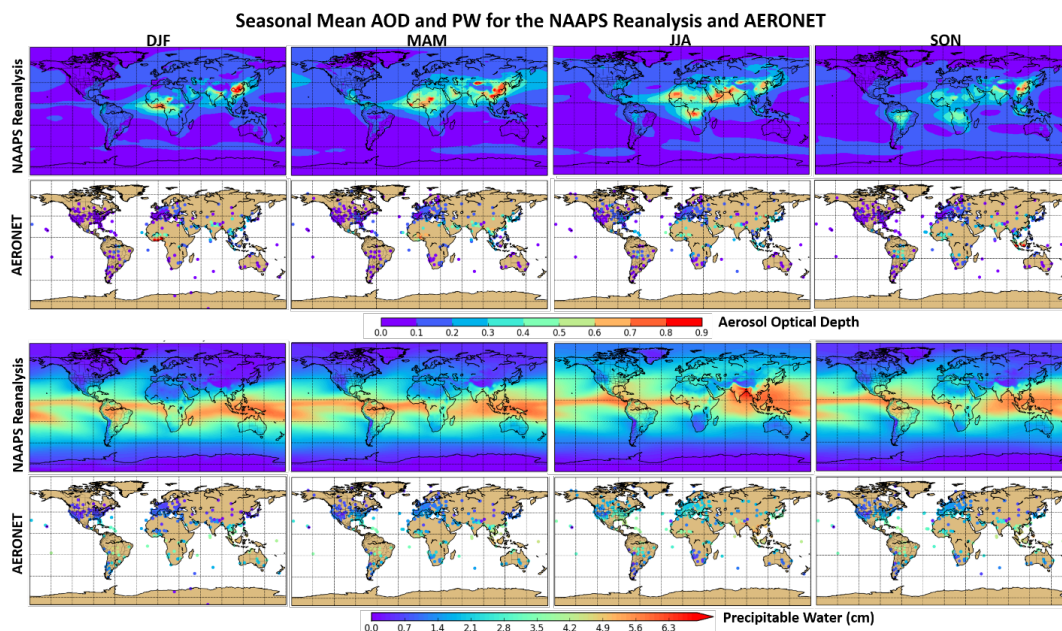

836

837 Figure 3. Mean AOD and Precipitable Water (cm) for the NAAPS-RA and at AERONET sites by season: DJF, MAM, JJA,  
 838 SON.

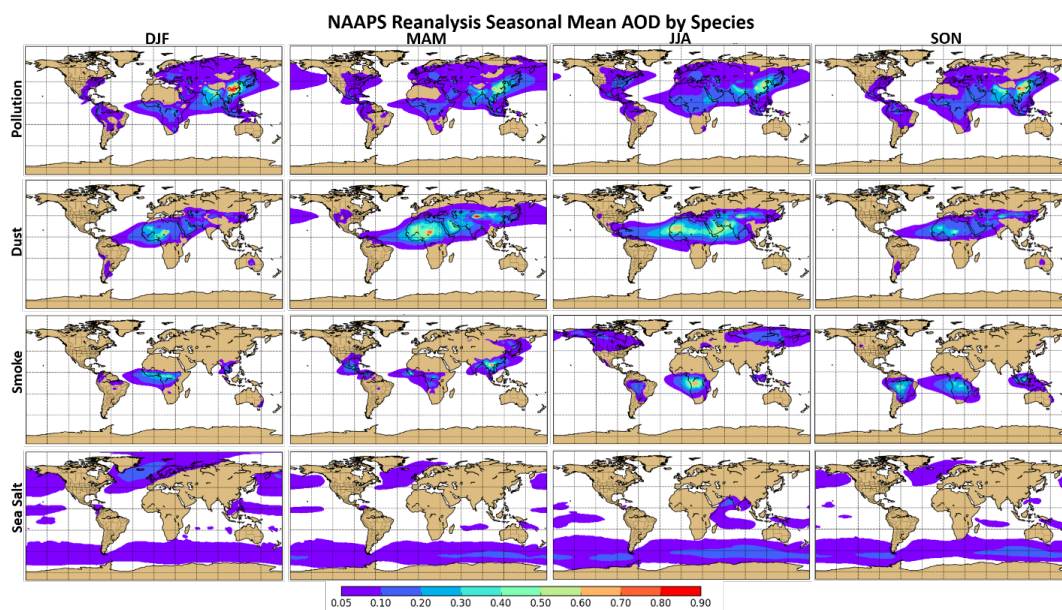

839

840 Figure 4. NAAPS-RA seasonally averaged AOD by aerosol type, including pollution (anthropogenic and biogenic fine  
 841 aerosol), dust, smoke, and sea salt.



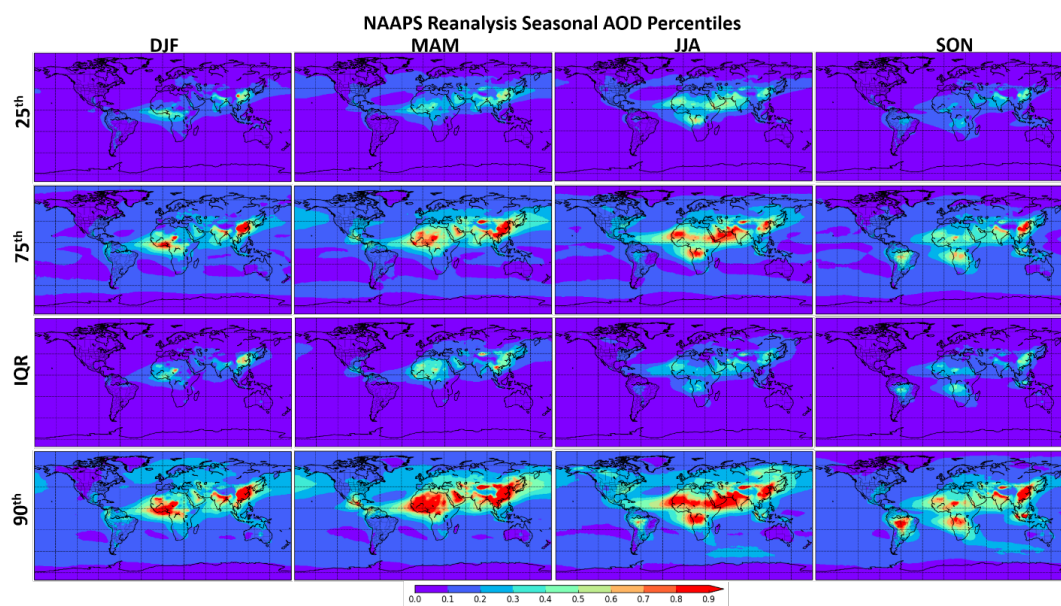

842

843 **Figure 5.** NAAPS-RA AOD percentiles by season (DJF, MAM, JJA, SON). The 25th and 75th percentiles are shown along  
 844 with the interquartile range (IQR). The 90th percentile is used to show high AOD values at a given location.

845

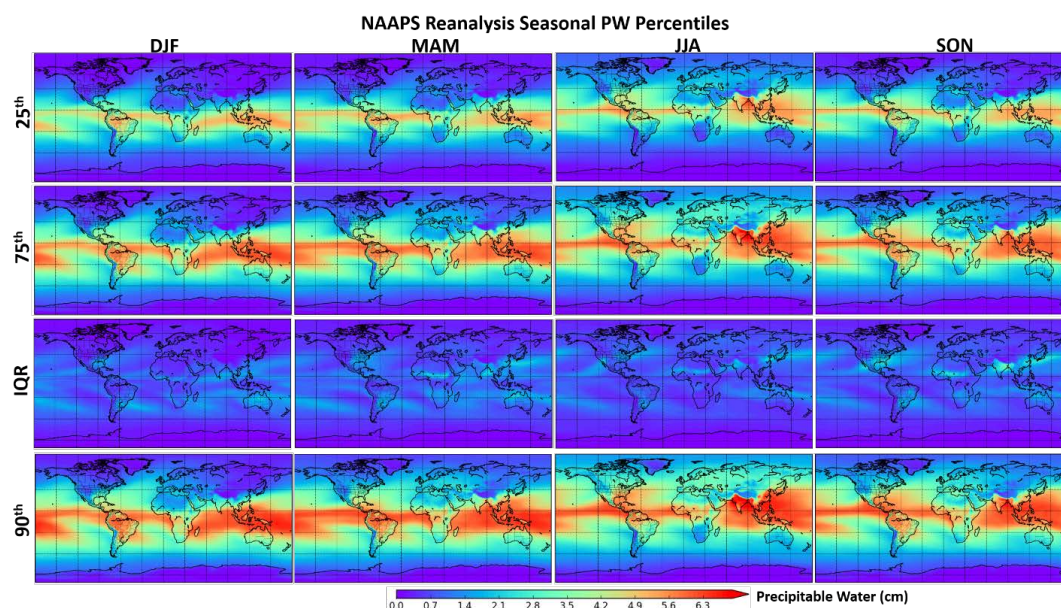

846

847 **Figure 6.** NAAPS-RA PW percentiles by season (DJF, MAM, JJA, SON). The 25th and 75th percentiles are shown along  
 848 with the interquartile range (IQR). The 90th percentile is used to show high PW values at a given location.

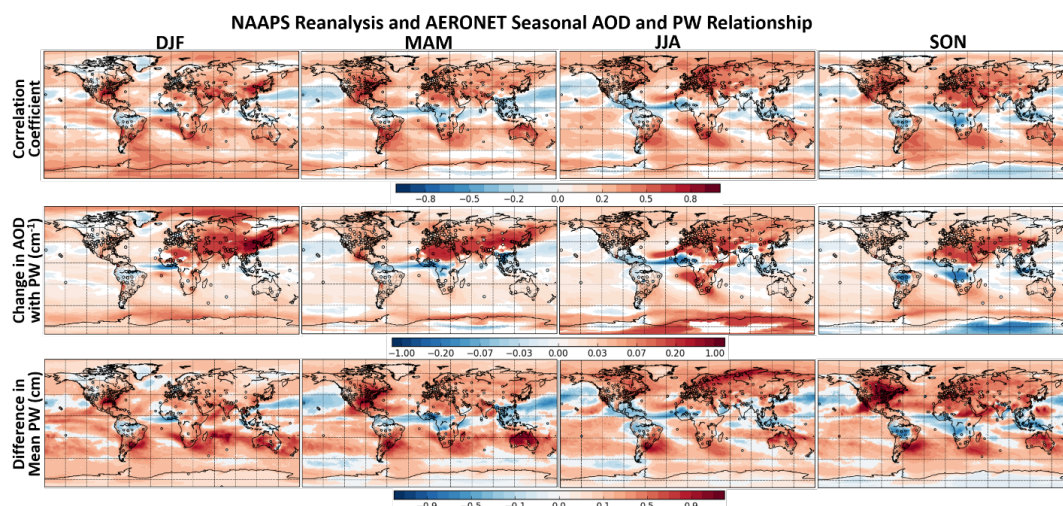

849

850 Figure 7. Seasonal AOD and PW relationships based on AERONET data (circles) and the NAAPS-RA (global map) shown  
 851 as: a) correlation coefficients between daily-averaged AOD and PW (non-zero values are statistically significant at the 95%  
 852 level) b) Theil-Sen regression slopes (change in AOD with PW) between daily-averaged AOD and PW in units of  $\text{cm}^{-1}$  at  
 853 locations where the correlation is statistically significant and c) the statistically significant difference in mean PW (cm)  
 854 between the PW distribution associated with high AOD events ( $> 1$  standard deviation above mean) and the PW distribution  
 855 for all AOD values. Red regions indicate a positive relationship between AOD and PW (higher moisture conditions for  
 856 higher AOD events) and blue regions indicate a negative relationship (drier conditions for higher AOD events).

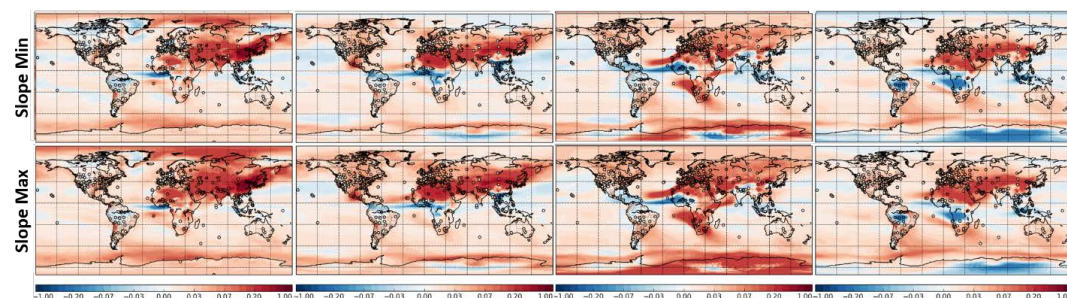

857

858 Figure 8. The 95% confidence interval in the Theil-Sen change in AOD with PW ( $\text{cm}^{-1}$ ) for DJF, MAM, JJA, and SON.  
 859 The confidence intervals are shown for both the NAAPS-RA and AERONET.

860

861

862



Scatterplot Comparison of AERONET and NAAPS Seasonal AOD/PW Relationships

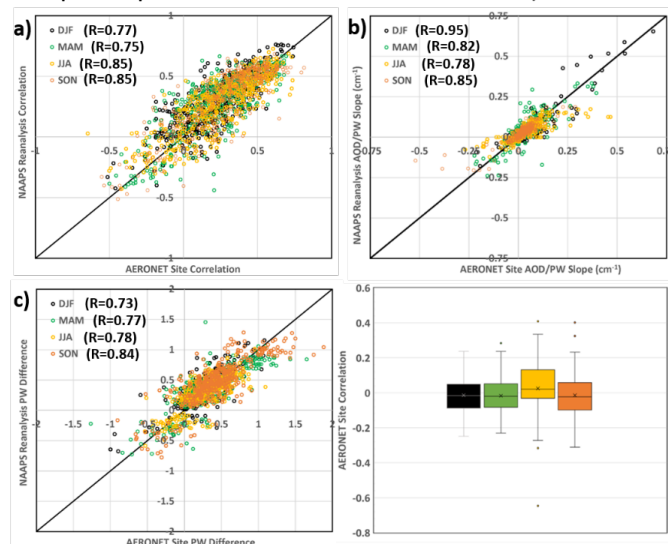

Figure 9. Scatterplot comparisons of the NAAPS-RA and AERONET: a) AOD and PW correlations at AERONET sites b) the change in AOD with PW ( $\text{cm}^{-1}$ ) at AERONET sites and c) the statistically significant difference in mean PW associated with high AOD events compared to the full PW distribution at AERONET sites. The comparisons are shown by season (DJF, MAM, SON, JJA) and correlations between the datasets are included. Additionally, the distribution of AERONET site correlations for which sign differences were found between NAAPS and AERONET calculated AOD/PW relationships are shown seasonally in d).



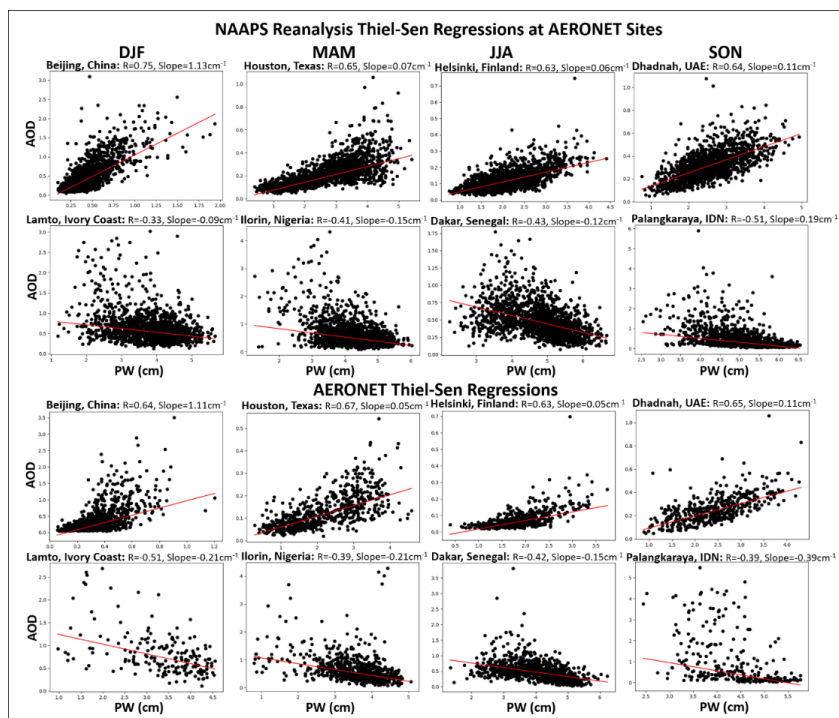

871

872 Figure 10. Seasonal examples of NAAPS-RA and AERONET Thiel-Sen regression calculations for positive correlation  
 873 locations (Beijing, Houston, Helsinki, Dhadnah) and a negative correlation locations (Lamto, Ilorin, Dakar, Palangkaraya).  
 874 The black dots are the AOD and PW pairs from the NAAPS-RA or AERONET and the red line is the Thiel-Sen fitting,  
 875 which is the median of the slopes for the range of data pairings. The location name, correlation coefficient (R), and the  
 876 Thiel-Sen slope (Slope) are included with each plot.

877

878

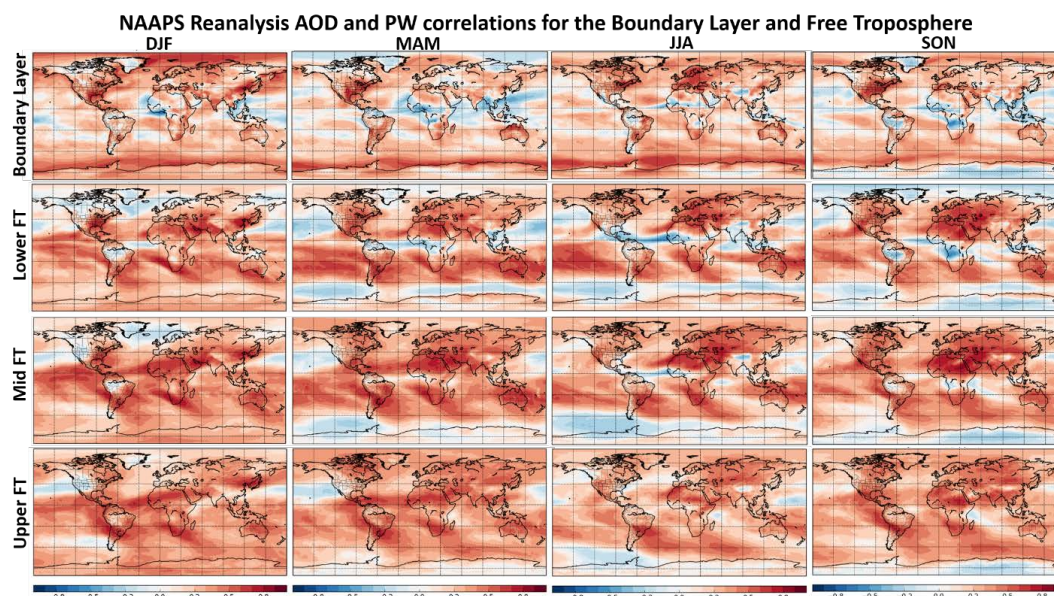

879

880 **Figure 11. NAAPS-RA seasonal correlations (DJF, MAM, JJA, SON) between vertically-integrated total aerosol extinction**  
 881 **and specific humidity in the boundary layer, lower free troposphere, mid free troposphere and upper free troposphere. Red**  
 882 **values indicate a positive correlation and blue values indicate a negative correlation.**

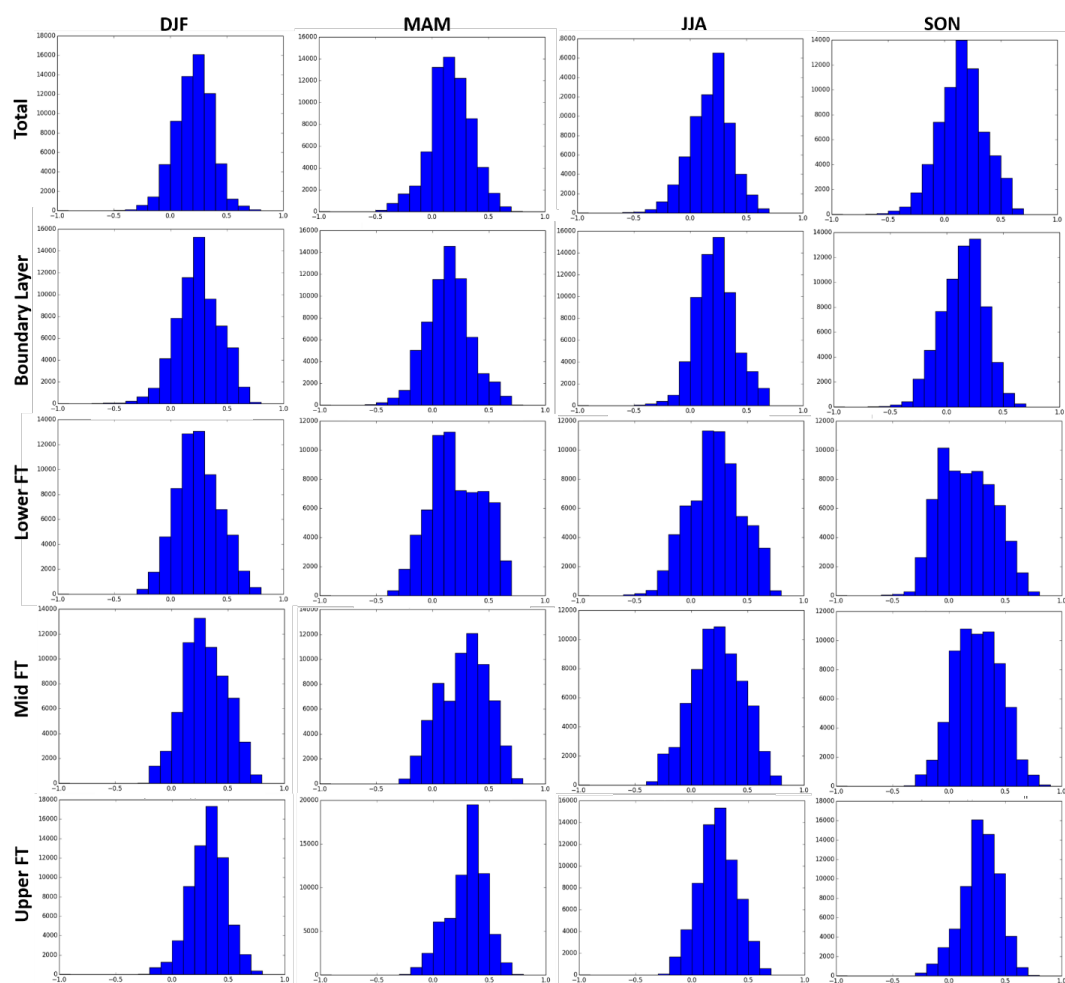

883

884 **Figure 12.** AOD and PW correlation histograms by season for the full integrated column (Total) and vertical components  
 885 of the atmosphere (Boundary Layer, Lower/Mid/Upper Free Troposphere).

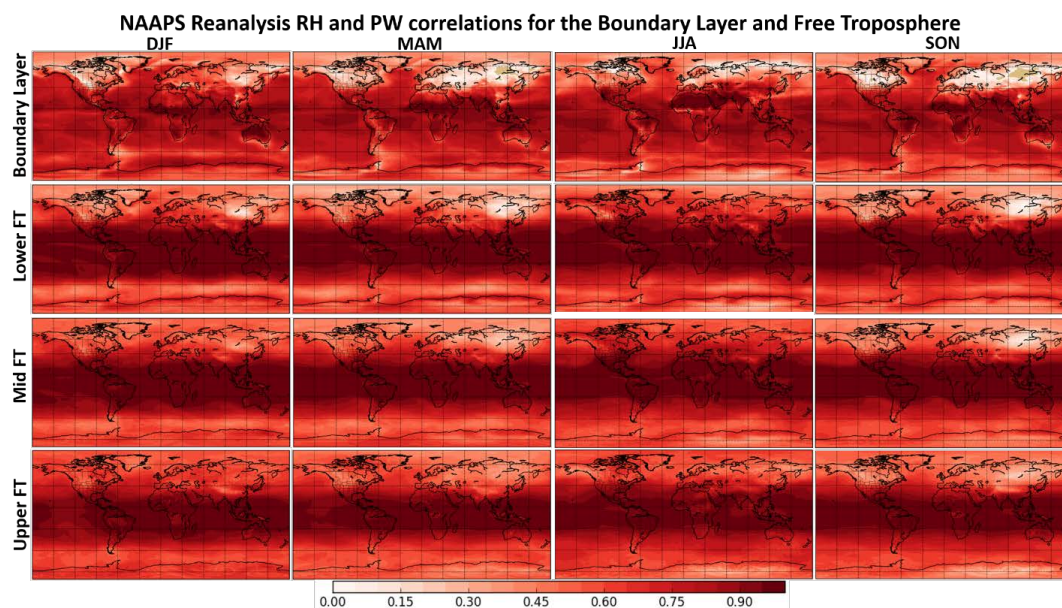

886

887 **Figure 13.** NAAPS-RA seasonal correlations (DJF, MAM, JJA, SON) between vertically-integrated relative humidity  
 888 (integrated specific humidity/integrated saturation specific humidity) and specific humidity in the boundary layer, lower  
 889 free troposphere, mid free troposphere and upper free troposphere.

890

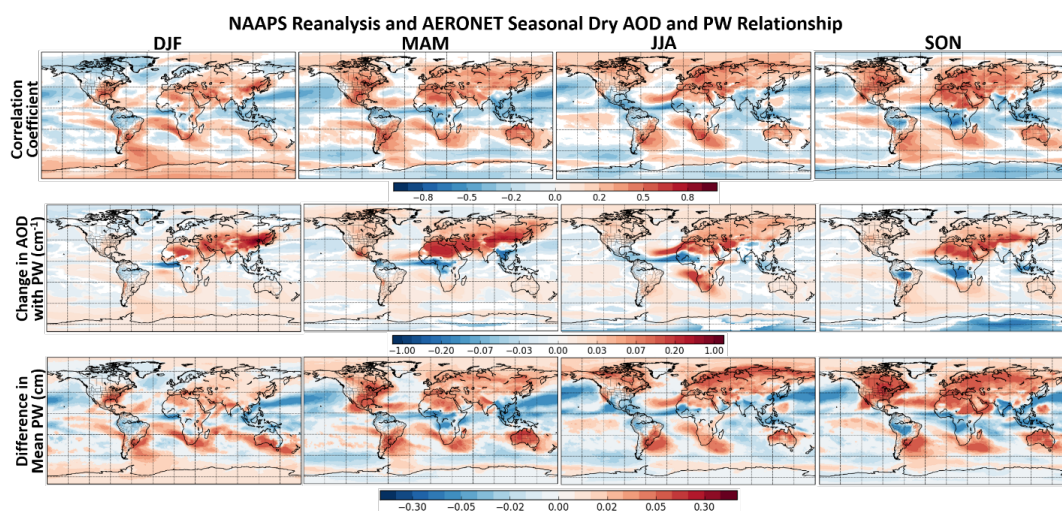

891

892 **Figure 14.** Seasonal dry AOD and PW relationships based on the NAAPS-RA shown as: a) correlation coefficients between  
 893 daily-averaged dry AOD and PW (non-zero values are statistically significant at the 95% level) b) Theil-Sen regression  
 894 slopes (change in AOD with PW) between daily-averaged dry AOD and PW in units of cm-1 at locations where the  
 895 correlation is statistically significant and c) the statistically significant difference in mean PW (cm) between the PW  
 896 distribution associated with high dry AOD events ( $> 1$  standard deviation above mean) and the PW distribution for all AOD





values. Red regions indicate a positive relationship between dry AOD and PW and blue regions indicate a negative relationship.

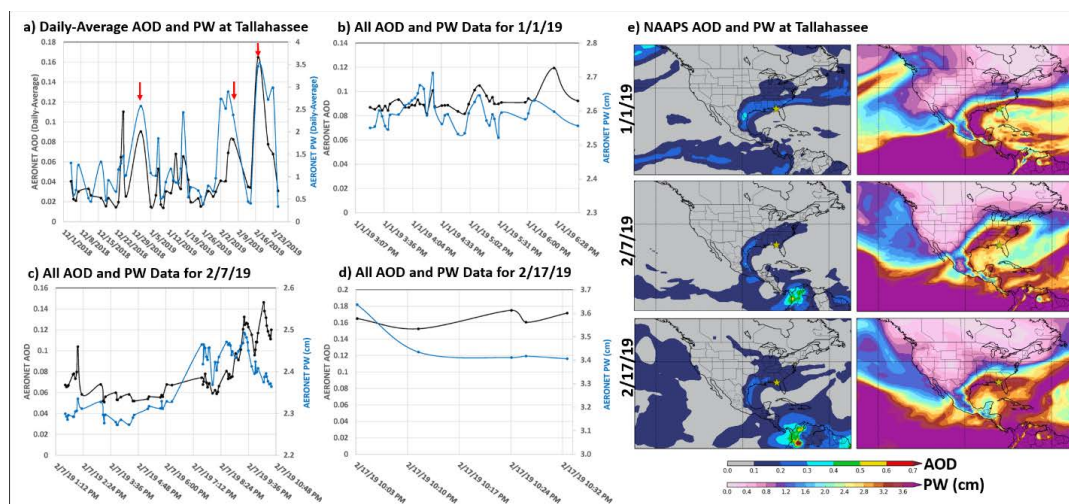

Figure 15. AOD and PW timeseries at the Tallahassee, Florida site in which strong positive correlations are observed during the DJF season. The daily-average AOD and PW timeseries are shown for the 2018-2019 DJF season with red arrows indicating select events for which joint peaks in AOD and PW are observed (a). Timeseries of AERONET data (non-averaged, all data) for dates identified with red arrows are shown in timeseries b-d. Additionally, NAAPS-RA AOD and PW (cm) fields are shown for the same dates with the AERONET site marked with a yellow star (e).

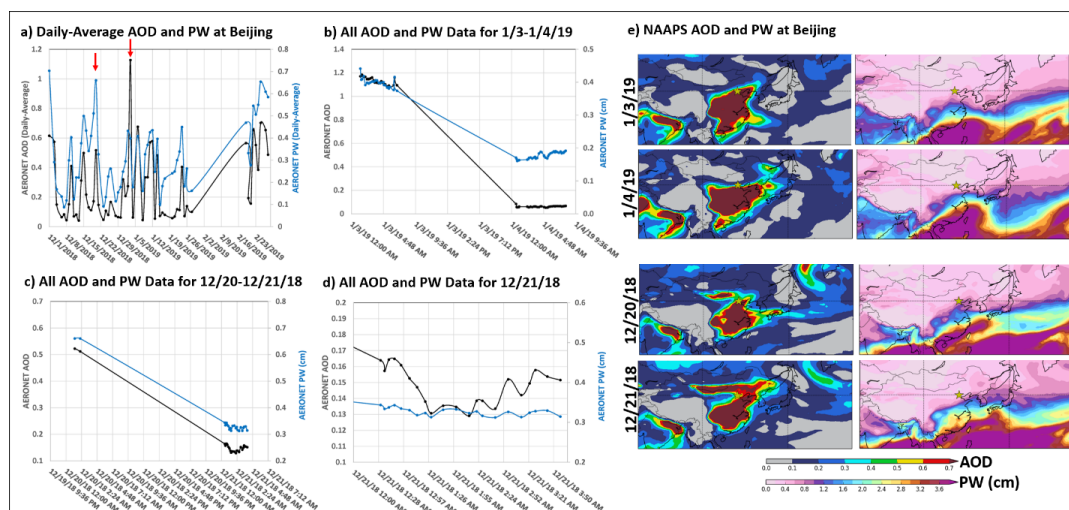

Figure 16. AOD and PW timeseries at the Beijing, China site in which strong positive correlations are observed during the DJF season. The daily-average AOD and PW timeseries are shown for the 2018-2019 DJF season with red arrows indicating select events for which joint peaks in AOD and PW are observed (a). Timeseries of AERONET data (non-averaged, all data) for dates identified with red arrows are shown in timeseries b-d. Additionally, NAAPS-RA AOD and PW (cm) fields are shown for the same dates with the AERONET site marked with a yellow star (e), including the air mass movement for 1/3-1/4/19 and 12/20-12/21/18.

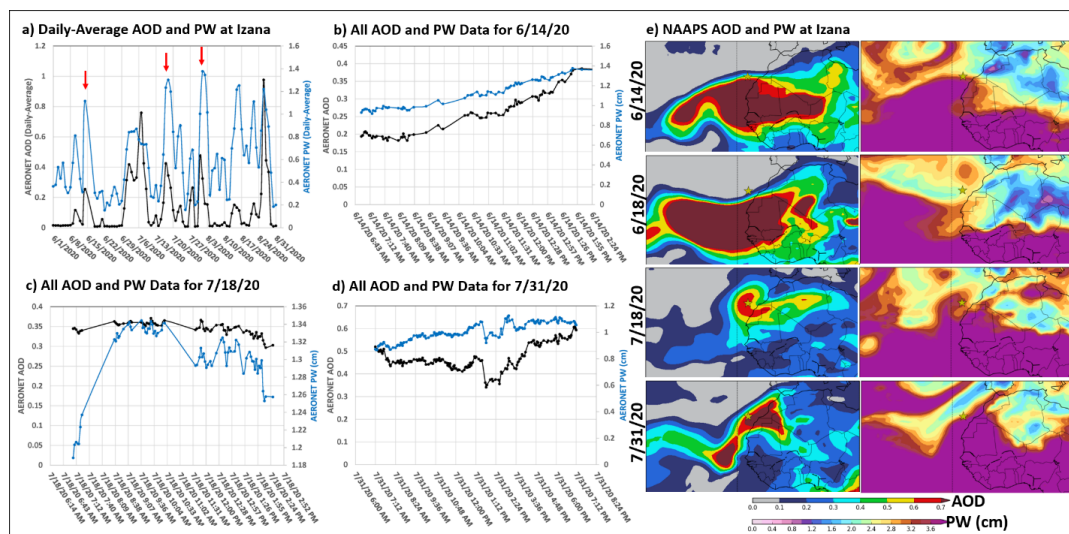

912

913 Figure 17. AOD and PW timeseries at the Izana, Canary Islands site in which strong positive correlations are observed  
 914 during the JJA season. The daily-average AOD and PW timeseries are shown for the 2020 JJA season with red arrows  
 915 indicating select events for which joint peaks in AOD and PW are observed (a). Timeseries of AERONET data (non-  
 916 averaged, all data) for dates identified with red arrows are shown in timeseries b-d. Additionally, NAAPS-RA AOD and  
 917 PW (cm) fields are shown for the same dates with the AERONET site marked with a yellow star (e). The fields for 6/18/20  
 918 are also included which show the joint dip in AOD and PW in the (a) timeseries after the 6/14 event.

919

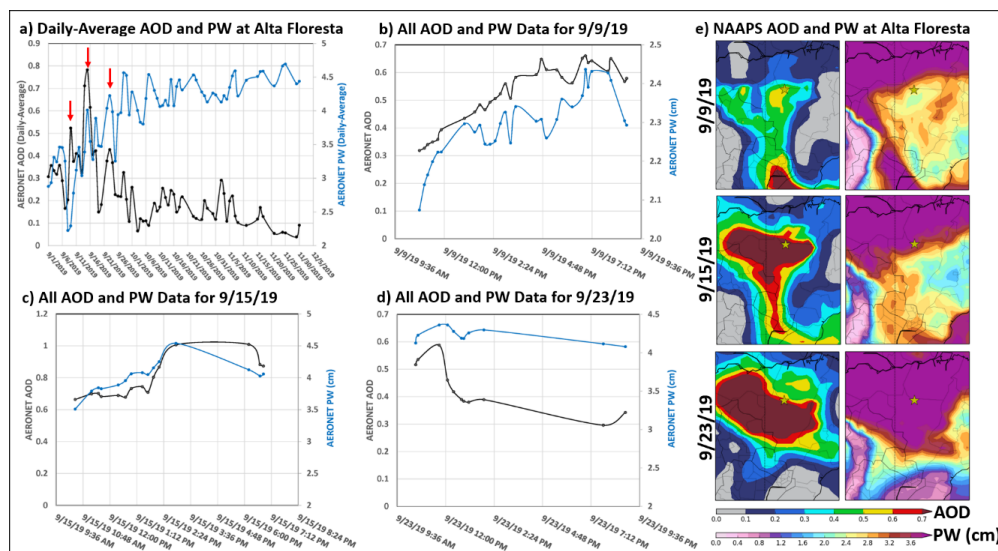

920

921 Figure 18. AOD and PW timeseries at the Alta Floresta site in Brazil in which negative AOD and PW correlations were  
 922 identified in the seasonal analysis. The daily-average AOD and PW timeseries are shown for the 2019 SON season with red  
 923 arrows indicating select events for further evaluation (a). AERONET AOD and PW timeseries (non-averaged, all data) for  
 924 the selected events are shown in timeseries b-d. Additionally, NAAPS-RA AOD and PW (cm) fields are shown for the same  
 925 dates with the AERONET site marked with a yellow star (e).





**Table 1. AOD and PW relationship evaluation results for DJF at select AERONET sites that exhibited the strongest AERONET correlations, positive and negative. The site name and latitude/longitude information are shown as well as the correlation (R), change in AOD with PW (Slope), and the statistically significant difference in mean PW for high AOD events (PW Diff) for both AERONET and the NAAPS-RA.**

| AERONET Site       | Lat   | Lon    | AERONET |                           |              | NAAPS Reanalysis |                           |              |
|--------------------|-------|--------|---------|---------------------------|--------------|------------------|---------------------------|--------------|
|                    |       |        | R       | Slope (cm <sup>-1</sup> ) | PW Diff (cm) | R                | Slope (cm <sup>-1</sup> ) | PW Diff (cm) |
| Stennis            | 30.37 | -89.62 | 0.743   | 0.044                     | 1.082        | 0.739            | 0.042                     | 1.156        |
| Tallahassee        | 30.45 | -84.30 | 0.739   | 0.024                     | 1.068        | 0.664            | 0.037                     | 0.901        |
| Beijing-CAMS       | 39.93 | 116.32 | 0.707   | 1.016                     | 0.225        | 0.755            | 1.132                     | 0.347        |
| XiangHe            | 39.75 | 116.96 | 0.673   | 1.349                     | 0.196        | 0.755            | 1.132                     | 0.347        |
| SEARCH-Centreville | 32.90 | -87.25 | 0.665   | 0.028                     | 0.931        | 0.706            | 0.045                     | 1.000        |
| Univ_of_Houston    | 29.72 | -95.34 | 0.661   | 0.039                     | 0.734        | 0.762            | 0.058                     | 1.109        |
| SEARCH-OLF         | 30.55 | -87.38 | 0.659   | 0.025                     | 0.820        | 0.720            | 0.039                     | 1.069        |
| Beijing            | 39.98 | 116.38 | 0.638   | 1.108                     | 0.211        | 0.755            | 1.132                     | 0.347        |
| UAHuntsville       | 34.73 | -86.64 | 0.633   | 0.029                     | 0.930        | 0.684            | 0.049                     | 0.866        |
| UH_Coastal_Center  | 29.39 | -95.04 | 0.624   | 0.039                     | 0.862        | 0.762            | 0.058                     | 1.109        |
| Dhadnah            | 25.51 | 56.32  | 0.610   | 0.120                     | 0.535        | 0.548            | 0.110                     | 0.653        |
| Ilorin             | 8.48  | 4.67   | -0.261  | -0.100                    | -0.513       | -0.159           | -0.063                    | -0.356       |
| Pontianak          | 0.08  | 109.19 | -0.345  | -0.054                    | -0.476       | -0.255           | -0.029                    | -0.278       |
| Koforidua_ANUC     | 6.11  | -0.30  | -0.459  | -0.194                    | -0.894       | -0.424           | -0.178                    | -0.676       |
| Jambi              | -1.63 | 103.64 | -0.473  | -0.110                    | -0.942       | -0.217           | -0.039                    | -0.392       |
| LAMTO-STATION      | 6.22  | -5.03  | -0.513  | -0.214                    | -0.999       | -0.331           | -0.093                    | -0.644       |

**Table 2. AOD and PW relationship evaluation results for MAM at select AERONET sites that exhibited the strongest AERONET correlations, positive and negative. The site name and latitude/longitude information are shown as well as the correlation (R), change in AOD with PW (Slope), and the statistically significant difference in mean PW for high AOD events (PW Diff) for both AERONET and the NAAPS-RA.**

| AERONET Site      | Lat    | Lon     | AERONET |                           |              | NAAPS Reanalysis |                           |              |
|-------------------|--------|---------|---------|---------------------------|--------------|------------------|---------------------------|--------------|
|                   |        |         | R       | Slope (cm <sup>-1</sup> ) | PW Diff (cm) | R                | Slope (cm <sup>-1</sup> ) | PW Diff (cm) |
| UH_Coastal_Center | 29.39  | -95.04  | 0.694   | 0.041                     | 1.099        | 0.665            | 0.068                     | 1.058        |
| UMBC              | 39.25  | -76.71  | 0.680   | 0.042                     | 1.219        | 0.602            | 0.053                     | 0.870        |
| Stennis           | 30.37  | -89.62  | 0.680   | 0.046                     | 0.967        | 0.630            | 0.048                     | 0.978        |
| NEON_OSBS         | 29.69  | -81.99  | 0.679   | 0.032                     | 1.241        | 0.511            | 0.038                     | 0.737        |
| NEON_TALL         | 32.95  | -87.39  | 0.677   | 0.032                     | 0.915        | 0.604            | 0.047                     | 0.815        |
| Univ_of_Houston   | 29.72  | -95.34  | 0.666   | 0.048                     | 1.000        | 0.665            | 0.068                     | 1.058        |
| UAHuntsville      | 34.73  | -86.64  | 0.664   | 0.049                     | 0.992        | 0.611            | 0.050                     | 0.766        |
| CCNY              | 40.82  | -73.95  | 0.663   | 0.056                     | 1.132        | 0.614            | 0.056                     | 0.889        |
| CASLEO            | -31.80 | -69.30  | 0.652   | 0.020                     | 0.342        | 0.432            | 0.044                     | 0.218        |
| NEON_ORNL         | 35.96  | -84.28  | 0.649   | 0.033                     | 1.007        | 0.586            | 0.051                     | 0.698        |
| Nainital          | 29.36  | 79.46   | 0.629   | 0.256                     | 0.422        | 0.388            | 0.112                     | 0.457        |
| Midway_Island     | 28.21  | -177.38 | -0.326  | -0.033                    | -0.370       | -0.323           | -0.026                    | -0.490       |
| Mandalay_MTU      | 21.97  | 96.19   | -0.338  | -0.049                    | -0.439       | -0.384           | -0.080                    | -0.717       |
| LAMTO-STATION     | 6.22   | -5.03   | -0.353  | -0.177                    | -0.429       | -0.321           | -0.132                    | -0.350       |
| Vientiane         | 17.99  | 102.57  | -0.355  | -0.130                    | -0.451       | -0.377           | -0.144                    | -0.408       |
| Chiang_Mai_Met_St | 18.77  | 98.97   | -0.372  | -0.109                    | -0.586       | -0.391           | -0.126                    | -0.554       |
| Jambi             | -1.63  | 103.64  | -0.392  | -0.034                    | -1.265       | -0.206           | -0.020                    | -0.220       |
| Ilorin            | 8.48   | 4.67    | -0.392  | -0.210                    | -0.710       | -0.412           | -0.151                    | -0.726       |
| NGHIA_DO          | 21.05  | 105.80  | -0.455  | -0.216                    | -0.632       | -0.318           | -0.166                    | -0.349       |
| Djougou           | 9.76   | 1.60    | -0.500  | -0.222                    | -0.836       | -0.385           | -0.114                    | -0.700       |



Table 3. AOD and PW relationship evaluation results for JJA at select AERONET sites that exhibited the strongest AERONET correlations, positive and negative. The site name and latitude/longitude information are shown as well as the correlation (R), change in AOD with PW (Slope), and the statistically significant difference in mean PW for high AOD events (PW Diff) for both AERONET and the NAAPS-RA. PW difference values of 0 in the NAAPS-RA indicate the change was not statistically significant.

| AERONET Site       | Lat    | Lon    | AERONET |                           |              | NAAPS Reanalysis |                           |              |
|--------------------|--------|--------|---------|---------------------------|--------------|------------------|---------------------------|--------------|
|                    |        |        | R       | Slope (cm <sup>-1</sup> ) | PW Diff (cm) | R                | Slope (cm <sup>-1</sup> ) | PW Diff (cm) |
| Huambo             | -12.87 | 15.70  | 0.737   | 0.365                     | 0.447        | 0.467            | 0.174                     | 0.350        |
| DRAGON_OLNES       | 39.15  | -77.07 | 0.731   | 0.088                     | 0.894        | 0.399            | 0.048                     | 0.386        |
| Pretoria_CSIR-DPSS | -25.76 | 28.28  | 0.731   | 0.140                     | 0.438        | 0.660            | 0.120                     | 0.446        |
| DRAGON_CLLGP       | 38.99  | -76.91 | 0.719   | 0.085                     | 1.097        | 0.348            | 0.039                     | 0.387        |
| Durban_UKZN        | -29.82 | 30.94  | 0.711   | 0.111                     | 0.670        | 0.687            | 0.131                     | 0.567        |
| Raciborz           | 50.08  | 18.19  | 0.672   | 0.065                     | 0.749        | 0.614            | 0.085                     | 0.578        |
| Izana              | 28.31  | -16.50 | 0.662   | 0.240                     | 0.345        | 0.477            | 0.152                     | 0.495        |
| Helsinki           | 60.20  | 24.96  | 0.633   | 0.052                     | 0.790        | 0.631            | 0.060                     | 0.698        |
| IMS-METU-ERDEML    | 36.57  | 34.26  | 0.632   | 0.099                     | 0.543        | 0.559            | 0.073                     | 0.484        |
| CLUJ_UBB           | 46.77  | 23.55  | 0.632   | 0.091                     | 0.529        | 0.602            | 0.100                     | 0.438        |
| Pokhara            | 28.19  | 83.98  | -0.349  | -0.111                    | -0.452       | 0.029            | 0.026                     | 0.000        |
| Bidi_Bahn          | 14.06  | -2.45  | -0.360  | -0.175                    | -0.244       | -0.251           | -0.060                    | -0.305       |
| Ouagadougou        | 12.42  | -1.49  | -0.385  | -0.180                    | -0.292       | -0.205           | -0.059                    | -0.211       |
| Lumbini            | 27.49  | 83.28  | -0.388  | -0.157                    | -0.434       | -0.098           | -0.013                    | -0.171       |
| Dakar              | 14.39  | -16.96 | -0.418  | -0.146                    | -0.528       | -0.428           | -0.122                    | -0.584       |
| Agoufou            | 15.35  | -1.48  | -0.491  | -0.209                    | -0.533       | -0.258           | -0.060                    | -0.346       |
| IER_Cinzana        | 13.28  | -5.93  | -0.501  | -0.269                    | -0.424       | -0.279           | -0.077                    | -0.259       |
| Jomsom             | 28.78  | 83.71  | -0.646  | -0.064                    | -0.581       | 0.029            | 0.026                     | 0.000        |

Table 4. AOD and PW relationship evaluation results for SON at select AERONET sites that exhibited the strongest AERONET correlations, positive and negative. The site name and latitude/longitude information are shown as well as the correlation (R), change in AOD with PW (Slope), and the statistically significant difference in mean PW for high AOD events (PW Diff) for both AERONET and the NAAPS-RA. PW difference values of 0 in the NAAPS-RA indicate the change was not statistically significant.

| AERONET Site        | Lat    | Lon     | AERONET |                           |              | NAAPS Reanalysis |                           |              |
|---------------------|--------|---------|---------|---------------------------|--------------|------------------|---------------------------|--------------|
|                     |        |         | R       | Slope (cm <sup>-1</sup> ) | PW Diff (cm) | R                | Slope (cm <sup>-1</sup> ) | PW Diff (cm) |
| USDA                | 39.03  | -76.88  | 0.815   | 0.088                     | 1.883        | 0.570            | 0.036                     | 1.043        |
| SEARCH-Centreville  | 32.90  | -87.25  | 0.796   | 0.026                     | 1.748        | 0.531            | 0.032                     | 0.917        |
| St_Louis_University | 38.64  | -90.23  | 0.724   | 0.032                     | 1.369        | 0.574            | 0.037                     | 1.188        |
| Martova             | 49.94  | 36.95   | 0.706   | 0.070                     | 0.590        | 0.531            | 0.064                     | 0.633        |
| UMBC                | 39.25  | -76.71  | 0.699   | 0.035                     | 1.473        | 0.570            | 0.036                     | 1.043        |
| Poprad-Ganovce      | 49.04  | 20.32   | 0.689   | 0.053                     | 0.651        | 0.568            | 0.071                     | 0.525        |
| NEON_TALL           | 32.95  | -87.39  | 0.679   | 0.025                     | 1.184        | 0.531            | 0.032                     | 0.917        |
| GISS                | 40.80  | -73.96  | 0.673   | 0.062                     | 1.369        | 0.556            | 0.033                     | 0.950        |
| Harvard_Forest      | 42.53  | -72.19  | 0.666   | 0.035                     | 1.051        | 0.576            | 0.036                     | 1.020        |
| Mingo               | 36.97  | -90.14  | 0.655   | 0.040                     | 1.500        | 0.594            | 0.038                     | 1.186        |
| Dhahn               | 25.51  | 56.32   | 0.651   | 0.106                     | 0.757        | 0.643            | 0.115                     | 0.706        |
| Midway_Island       | 28.21  | -177.38 | -0.344  | -0.013                    | -0.431       | -0.172           | -0.007                    | -0.339       |
| Alta_Floresta       | -9.87  | -56.10  | -0.382  | -0.148                    | -0.573       | -0.470           | -0.197                    | -0.634       |
| Koforidua_ANUC      | 6.11   | -0.30   | -0.384  | -0.161                    | -0.173       | -0.252           | -0.046                    | -0.330       |
| Rio_Branco          | -9.96  | -67.87  | -0.426  | -0.121                    | -0.496       | -0.430           | -0.145                    | -0.643       |
| Abracos_Hill        | -10.76 | -62.36  | -0.430  | -0.226                    | -0.351       | -0.401           | -0.205                    | -0.373       |
| Ilorin              | 8.48   | 4.67    | -0.431  | -0.091                    | -0.653       | -0.227           | -0.033                    | -0.476       |
| Palangkaraya        | -2.23  | 113.95  | -0.443  | -0.385                    | -0.549       | -0.512           | -0.195                    | -0.886       |
| Ji_Parana_SE        | -10.93 | -61.85  | -0.483  | -0.197                    | -0.659       | -0.412           | -0.203                    | -0.393       |
| Pontianak           | 0.08   | 109.19  | -0.536  | -0.521                    | -0.644       | -0.400           | -0.145                    | -0.454       |
| Kuching             | 1.49   | 110.35  | -0.552  | -0.373                    | -0.528       | -0.329           | -0.111                    | -0.360       |



## 950 References

- 951 American Meteorological Society, 2020: Aerosol. Glossary of  
 952 Meteorology, <http://glossary.ametsoc.org/wiki/climatology>. Last accessed Jan 2021.
- 953 Adebiyi, A. A., Zuidema, P., and Abel, S. J.: The Convolution of Dynamics and Moisture with the Presence of  
 954 Shortwave Absorbing Aerosols over the Southeast Atlantic, *Journal of Climate*, 28, 1997–2024,  
 955 <https://doi.org/10.1175/JCLI-D-14-00352.1>, 2015.
- 956 Arola, A., Eck, T. F., Kokkola, H., Pitkänen, M. R. A., and Romakkaniemi, S.: Assessment of cloud-related fine-  
 957 mode AOD enhancements based on AERONET SDA product, *Atmos. Chem. Phys.*, 17, 5991–6001,  
 958 <https://doi.org/10.5194/acp-17-5991-2017>, 2017.
- 959 Barreto, Á., Cuevas, E., García, R. D., Carrillo, J., Prospero, J. M., Ilić, L., Basart, S., Berjón, A. J., Marrero, C. L.,  
 960 Hernández, Y., Bustos, J. J., Ničković, S., and Yela, M.: Long-term characterization of the vertical structure of the  
 961 Saharan Air Layer over the Canary Islands using lidar and radiosonde profiles: implications for radiative and cloud  
 962 processes over the subtropical Atlantic Ocean, *Atmos. Chem. Phys.*, 22, 739–763, [https://doi.org/10.5194/acp-22-](https://doi.org/10.5194/acp-22-739-2022)  
 963 739-2022, 2022.
- 964 Benedetti, A., Morcrette, J.-J., Boucher, O., Dethof, A., Engelen, R. J., Fisher, M., Flentje, H., Huneeus, N., Jones,  
 965 L., Kaiser, J. W., Kinne, S., Mangold, A., Razinger, M., Simmons, A. J., and Suttie, M.: Aerosol analysis and recast  
 966 in the European centre for Medium-Range Weather Forecasts Integrated Forecast  
 967 System: 2. Data assimilation, *J. Geophys. Res.*, 114, D13205, doi:10.1029/2008JD011115, 2009.
- 968 Charlson, R.J., S.E. Schwartz, J.M. Hales, R.D. Cess, J.A. Coakley, Jr., J.E. Hansen, and D.J. Hoffman: Climate  
 969 forcing by anthropogenic aerosols. *Science*, 255, 423–430, doi:10.1126/science.255.5043.423, 1992.
- 970 Daley, R. and Barker, E.: NAVDAS: Formulation and diagnostics, *Mon. Weather Rev.*, 129, 869–883,  
 971 [https://doi.org/10.1175/1520-0493\(2001\)129,2001](https://doi.org/10.1175/1520-0493(2001)129,2001).
- 972 Deaconu, L. T., Ferlay, N., Waquet, F., Peers, F., Thieuleux, F., and Goloub, P.: Satellite inference of water vapour  
 973 and above-cloud aerosol combined effect on radiative budget and cloud-top processes in the southeastern Atlantic  
 974 Ocean, *Atmos. Chem. Phys.*, 19, 11613–11634, <https://doi.org/10.5194/acp-19-11613-2019>, 2019.
- 975 DeSouza-Machado, S. G., Strow, L. L., Hannon, S. E., and Motteler, H. E.: Infrared dust spectral signatures from  
 976 AIRS, *Geophys. Res. Lett.*, 33, L03801, doi:10.1029/2005GL024364, 2006.
- 977 De Tomasi, F., and Perrone, M. R.: Lidar measurements of tropospheric water vapor and aerosol profiles over  
 978 southeastern Italy, *J. Geophys. Res.*, 108, 4286, doi:10.1029/2002JD002781, 2003.
- 979 Eck, T. F., and Holben, B. N.: AVHRR split window temperature differences and total precipitable water over land  
 980 surfaces, *International Journal of Remote Sensing*, 15:3, 567–582, doi: 10.1080/01431169408954097, 1994.
- 981 Eck, T. F., Holben B. N., Reid, J. S., Dubovik, O., Smirnov, A., O'Neill, N. T., Slutsker, I., and Kinne, S.:  
 982 Wavelength dependence of the optical depth of biomass burning, urban, and desert  
 983 dust aerosols, *J. Geophys. Res.*, 104, 31333–31349, DOI: 10.1029/1999JD900923, 1999.
- 984 Eck, T.F., Holben, B.N., Reid, J.S., Giles, D.M., Rivas, M.A., Singh, R.P., Tripathi, S.N., Bruegge, C.J., Platnick,  
 985 S., Arnold, G.T., Krotkov, N.A., Carn, S.A., Sinyuk, A., Dubovik, O., Arola, A., Schafer, J.S., Artaxo, P., Smirnov,  
 986 A., Chen, H., Goloub, P.: Fog- and cloud-induced aerosol modification observed by the Aerosol Robotic Network  
 987 (AERONET), *J. Geophys. Res.*, 117, D07206, doi:10.1029/2011JD016839, 2012.
- 988 Eck, T. F., Holben, B. N., Reid, J. S., Arola, A., Ferrare, R. A., Hostetler, C. A., Crumeyrolle, S. N., Berkoff, T. A.,  
 989 Welton, E. J., Lolli, S., Lyapustin, A., Wang, Y., Schafer, J. S., Giles, D. M., Anderson, B. E., Thornhill, K. L.,  
 990 Minnis, P., Pickering, K. E., Loughner, C. P., Smirnov, A., and Sinyuk, A.: Observations of rapid aerosol optical  
 991 depth enhancements in the vicinity of polluted cumulus clouds, *Atmos. Chem. Phys.*, 14, 11633–11656,  
 992 <https://doi.org/10.5194/acp-14-11633-2014>, 2014.
- 993 Eck, T. F., Holben, B. N., Reid, J. S., Xian, P., Giles, D. M., Sinyuk, A., Smirnov, A., Schafer, J.S., Slutsker, I., Kim,  
 994 J., Koo, J.-H., Choi, M., Kim, K.C., Sano, I., Arola, A., Sayer, A.M., Levy, R.C., Munchak, L.A., O'Neill, N.T.,  
 995 Lyapustin, A., Hsu, N.C., Randles, C.A., Da Silva, A.M., Buchard, V., Govindaraju, R.C., Hyer, E., Crawford, J.H.,  
 996 Wang, P., Xia, X.: Observations of the interaction and transport of fine mode aerosols with cloud and/or fog in

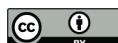

- 997 Northeast Asia from Aerosol Robotic Network and satellite remote sensing. *Journal of Geophysical Research: Atmospheres*, 123, 5560–5587. <https://doi.org/10.1029/2018JD028313>, 2018.
- 999 Eck, T.F., Holben, B.N., Giles, D.M., Slutsker, I., Sinyuk, A., Schafer, J.S., Smirnov, A., Sorokin, M., Reid, J.S.,  
1000 Sayer, A.M., Hsu, N.C., Shi, Y.R., Levy, R.C., Lyapustin, A., Rahman, M.A., Liew, S.-C., Cortijo, S.V.S., Li, R.,  
1001 Kalbermatter, D., Keong, K.L., Yugotomo, M.E., Aditya, F., Mohamad, M., Mahmud, M., Chong, T.K., Lim, H.-  
1002 S., Choon, Y.E., Deranadyan, G., Kusumaningtyas, S.D.A., Aldrian, E.: AERONET Remotely Sensed  
1003 Measurements and Retrievals of Biomass Burning Aerosol Optical Properties During the 2015 Indonesian Burning  
1004 Season, *J. Geophys. Res.*, 124, 4722–4740. <https://doi.org/10.1029/2018JD030182>, 2019.
- 1005 Francis, D., Fonseca, R., Nelli, N., Cuesta, J., Weston, M., Evan, A., and Temimi, M: The atmospheric drivers of the  
1006 major Saharan dust storm in June 2020, *Geophys. Res. Lett.*, 47, e2020GL090102.  
1007 <https://doi.org/10.1029/2020GL090102>, 2020.
- 1008 Frouin, R.J., Franz, B.A., Ibrahim, A., Knobelspiesse, K., Ahmad, Z., Cairns, B., Chowdhary, J., Dierssen, H.M.,  
1009 Tan, J., Dubovik, O., Huang, X., Davis, A.B., Kalashnikova, O., Thompson, D.R., Remer, L.A., Boss, E.,  
1010 Coddington, O., Deschamps, P.-Y., Gao, B.-C., Gross, L., Hasekamp, O., Omar, A., Pelletier, B., Ramon, D.,  
1011 Steinmetz, F., and Zhai, P.-W.: Atmospheric correction of satellite ocean-color imagery during the PACE Era. *Front.*  
1012 *Earth Sci.*, 7, 145, doi:10.3389/feart.2019.00145, 2019.
- 1013 Gao, M., Carmichael, G. R., Saide, P. E., Lu, Z., Yu, M., Streets, D. G., and Wang, Z.: Response of winter fine  
1014 particulate matter concentrations to emission and meteorology changes in North China, *Atmos. Chem. Phys.*, 16,  
1015 11837–11851, <https://doi.org/10.5194/acp-16-11837-2016>, 2016.
- 1016 Giles, D. M., Sinyuk, A., Sorokin, M. G., Schafer, J. S., Smirnov, A., Slutsker, I., Eck, T. F., Holben, B. N., Lewis,  
1017 J. R., Campbell, J. R., Welton, E. J., Korkin, S. V., and Lyapustin, A. I.: Advancements in the Aerosol Robotic  
1018 Network (AERONET) Version 3 database – automated near-real-time quality control algorithm with improved  
1019 cloud screening for Sun photometer aerosol optical depth (AOD) measurements, *Atmos. Meas. Tech.*, 12, 169–209,  
1020 <https://doi.org/10.5194/amt-12-169-2019>, 2019.
- 1021 Gobbi, G.P., Barnaba, F., Di Liberto, L., Bolignano, A., Lucarelli, F., Nava, S., Perrino, C., Pietrodangelo, A.,  
1022 Basart, S., Costabile, F., Dionisi, D., Rizza, U., Canepari, S., Sozzi, R., Morelli, M., Manigrasso, M., Drewnick, F.,  
1023 Struckmeier, C., Poenitz, K., Wille, H.: An inclusive view of Saharan dust advections to Italy and the Central  
1024 Mediterranean, *Atmospheric Environment*, Volume 201, 2019, Pages 242-256, ISSN 1352-2310,  
1025 <https://doi.org/10.1016/j.atmosenv.2019.01.002>, 2019.
- 1026 Granados-Muñoz, M. J., Sicard, M., Román, R., Benavent-Oltra, J. A., Barragán, R., Brogniez, G., Denjean, C.,  
1027 Mallet, M., Formenti, P., Torres, B., and Alados-Arboledas, L.: Impact of mineral dust on shortwave and longwave  
1028 radiation: evaluation of different vertically resolved parameterizations in 1-D radiative transfer computations ,  
1029 *Atmos. Chem. Phys.*, 19, 523–542, <https://doi.org/10.5194/acp-19-523-2019>, 2019.
- 1030 Gutleben, M., Groß, S., Wirth, M., Emde, C., & Mayer, B.: Impacts of water vapor on Saharan air layer radiative  
1031 heating. *Geophysical Research Letters*, 46, 14854– 14862, <https://doi.org/10.1029/2019GL085344>, 2019.
- 1032 Haywood, J. M., Bellouin, N., Jones, A., Boucher, O., Wild, M., and Shine, K. P.: The roles of aerosol, water vapor  
1033 and cloud in future global dimming/brightening, *J. Geophys. Res.*, 116, D20203, doi:10.1029/2011JD016000, 2011.
- 1034 Hänel, G.: The properties of atmospheric aerosol particles as functions of the relative humidity at thermo- dynamic  
1035 equilibrium with the surrounding moist air. *Adv. Geophys.* 19, 73-18, [https://doi.org/10.1016/S0065-](https://doi.org/10.1016/S0065-2687(08)60142-9)  
1036 [2687\(08\)60142-9](https://doi.org/10.1016/S0065-2687(08)60142-9), 1976.
- 1037 He Q., Ma, J., Zheng, X., Wang, Y., Wang Y., Mu, H., Cheng, T., He, R., Huang, G., Liu, D.: Formation and  
1038 dissipation dynamics of the Asian tropopause aerosol layer, *Environ. Res. Lett.* 16, 014015,  
1039 <https://doi.org/10.1088/1748-9326/abcd5d>, 2021.
- 1040 Heo, J.-H.; Ryu, G.-H.; Jang, J.-D. Optimal Interpolation of Precipitable Water Using Low Earth Orbit and  
1041 Numerical Weather Prediction Data. *Remote Sens.* 2018, 10, 436.
- 1042 Hogan, T. F., Liu, M., Ridout, J. S., Peng, M. S., Whitcomb, T. R., Ruston, B. C., Reynolds, C. A., Eckermann S.  
1043 D., Moskaitis, J. R., Baker, N. L., McCormack, J. P., Viner, K. C., McLay, J. G., Flatau, M. K., Xu, L., Chen, C.,  
1044 and Chang, S. W.: The Navy Global Environmental Model. *Oceanography*, Special Issue on Navy Operational  
1045 Models, 27, No. 3. 2014.



- 1046 Holben, B. N., Eck, T. F., Slutsker, I., Tanré, D., Buis, J. P., Setzer, A., Vermote, E., Reagan, J. A., Kaufman, Y. J.,  
 1047 Nakajima, T., Lavenue, F., Jankowiak, I., & Smirnov, A.: AERONET - A federated instrument network and data  
 1048 archive for aerosol characterization. *Remote Sensing of Environment*, 66(1), 1-16, [https://doi.org/10.1016/S0034-](https://doi.org/10.1016/S0034-4257(98)00031-5)  
 1049 4257(98)00031-5, 1998.
- 1050 Huttunen, J., Arola, A., Myhre, G., Lindfors, A. V., Mielonen, T., Mikkonen, S., Schafer, J. S., Tripathi, S. N., Wild,  
 1051 M., Komppula, M., and Lehtinen, K. E. J.: Effect of water vapor on the determination of aerosol direct radiative  
 1052 effect based on the AERONET fluxes, *Atmos. Chem. Phys.*, 14, 6103–6110, [https://doi.org/10.5194/acp-14-6103-](https://doi.org/10.5194/acp-14-6103-2014)  
 1053 2014, 2014.
- 1054 Ibrahim, A., Franz, B.A., Ahmad, Z., and Bailey, S.W.: Multiband atmospheric correction algorithm for ocean color  
 1055 retrievals, *Front. Earth Sci.*, <https://doi.org/10.3389/feart.2019.00116>, 2019.
- 1056 Ichoku, C., Allen Chu, D., Mattoo, S., Kaufman, Y.J., Remer, L.A., Tanre, D., Slutsker, I., and Holben, B.N.: A  
 1057 spatio-temporal approach for global validation and analysis of MODIS aerosol products, *Geophysical Research*  
 1058 *Letters*, 29(12), <https://doi.org/10.1029/2001GL013206>, 2002.
- 1059 Jeong, J.I., and Park, R.J.: Winter monsoon variability and its impact on aerosol concentrations in East Asia,  
 1060 *Environmental Pollution*, Volume 221, Pages 285-292, <https://doi.org/10.1016/j.envpol.2016.11.075>, 2017.
- 1061 Jung, E., Albrecht, B., Prospero, J. M., Jonsson, H. H., & Kreidenweis, S. M.: Vertical structure of aerosols,  
 1062 temperature, and moisture associated with an intense African dust event observed over the eastern  
 1063 Caribbean. *Journal of Geophysical Research Atmospheres*, 118, 4623–4643. <https://doi.org/10.1002/jgrd.50352>,  
 1064 2013.
- 1065 Kahn, R.A., Gaitley, B.J., Martonchik, J.V., Diner, D.J., Crean, K.A. and Holben, B.: Multiangle Imaging  
 1066 Spectroradiometer (MISR) global aerosol optical depth validation based on 2 years of coincident Aerosol Robotic  
 1067 Network (AERONET) observations. *Journal of Geophysical Research* 110: doi: 10.1029/2004JD004706. issn: 0148-  
 1068 0227, 2005.
- 1069 Kanitz, T., Ansmann, A., Seifert, P., Engelmann, R., Kalisch, J., & Althausen, D.: Radiative effect of aerosols above  
 1070 the northern and southern Atlantic Ocean as determined from shipborne lidar observations. *Journal of Geophysical*  
 1071 *Research; Atmospheres*, 118, 12,556– 12,565. <https://doi.org/10.1002/2013jd019750>, 2013.
- 1072 Kanitz, T., Engelmann, R., Heinold, B., Baars, H., Skupin, A., & Ansmann, A.: Tracking the Saharan air layer with  
 1073 shipborne lidar across the tropical atlantic. *Geophysical Research*  
 1074 *Letters*, 41, 1044– 1050. <https://doi.org/10.1002/2013gl058780>, 2014.
- 1075 Kannemadugu, H.B.S., Varghese, A.O., Mukkara, S.R., Joshi, A.K. and Moharil, S.V.: Discrimination of Aerosol  
 1076 Types and Validation of MODIS Aerosol and Water Vapour Products Using a Sun Photometer over Central  
 1077 India. *Aerosol Air Qual. Res.* 15: 682-693. <https://doi.org/10.4209/aaqr.2014.04.0088>, 2015.
- 1078 Karyampudi, V. M., Palm, S.P., Reagan, J.A., Fang, H., Grant, W.B, Hoff, R.M., Moulin, C., Pierce, H.F., Torres,  
 1079 O., Browell, E.V., and Melfi, S.H.: Validation of the Saharan dust plume conceptual model using Lidar, Meteosat,  
 1080 and ECMWF data, *Bull. Am. Meteorol. Soc.*, 80, 1045 – 1074, [https://doi.org/10.1175/1520-0477\(1999\)080<1045:ValidationoftheSaharandustplumecconceptualmodelusingLidar,Meteosat,andECMWFdata>2.0.CO;2](https://doi.org/10.1175/1520-0477(1999)080<1045:ValidationoftheSaharandustplumecconceptualmodelusingLidar,Meteosat,andECMWFdata>2.0.CO;2), 1999.
- 1081 Kaufman, Y. J., and Fraser, R. S.: The effect of smoke particles on clouds and climate forcing, *Science*, 277, 1636-  
 1082 1639, DOI: 10.1126/science.277.5332.1636, 1997.
- 1083 Kim, S.-W., Chazette, P., Dulac, F., Sanak, J., Johnson, B., and Yoon, S.-C.: Vertical structure of aerosols and water  
 1084 vapor over West Africa during the African monsoon dry season, *Atmos. Chem. Phys.*, 9, 8017–8038,  
 1085 <https://doi.org/10.5194/acp-9-8017-2009>, 2009.
- 1086 Kleinman, L.I., and Daum, P.H.: Vertical distribution of aerosol particles, water vapor, and insoluble trace gases in  
 1087 convectively mixed air, *J. Geophys. Res. Atmos.*, 96 (D1), 991-1005, <https://doi.org/10.1029/90JD02117>, 1991.
- 1088 Kuciauskas, A. P., Xian, P., Hyer, E. J., Oyola, M. I., & Campbell, J. R.: Supporting Weather Forecasters in  
 1089 Predicting and Monitoring Saharan Air Layer Dust Events as They Impact the Greater Caribbean, *Bulletin of the*  
 1090 *American Meteorological Society*, 99(2), 259-268, <https://doi.org/10.1175/BAMS-D-16-0212.1>, 2018.
- 1091 Kumar, K. R., Sivakumar, V., Reddy, R. R., Gopal, K. R., Adesina, A. J.: Inferring wavelength dependence of AOD  
 1092 and Ångström exponent over a sub-tropical station in South Africa using AERONET data: Influence of





- 1093 meteorology, long-range transport and curvature effect, *Science of The Total Environment*, 461, 397-408,  
 1094 <https://doi.org/10.1016/j.scitotenv.2013.04.095>, 2013.
- 1095 Kumar, K. R., Kang, N., Sivakumar, V., Griffith, D.: Temporal characteristics of columnar aerosol optical properties  
 1096 and radiative forcing (2011–2015) measured at AERONET's Pretoria\_CSIR\_DPSS site in South Africa,  
 1097 *Atmospheric Environment*, 165, 274-289, <https://doi.org/10.1016/j.atmosenv.2017.06.048>, 2017.
- 1098 Lee, E., Županski, M., Županski, D. and Park, S. K.: Impact of the OMI aerosol optical depth on analysis increments  
 1099 through coupled meteorology–aerosol data assimilation for an Asian dust storm, *Remote Sens. Environ.*, 193, 38–  
 1100 53, 30 doi:10.1016/j.rse.2017.02.013, 2017.
- 1101 Li, Q., Zhang, R., and Wang, Y.: Interannual variation of the wintertime fog-haze days across central and eastern  
 1102 China and its relation with East Asian winter monsoon, *International Journal of Climatology*, 36(1),  
 1103 <https://doi.org/10.1002/joc.4350>, 2016.
- 1104 Li, J., Liao, H., Hu, J., Li, N., Severe particulate pollution days in China during 2013-2018 and the associated typical  
 1105 weather patterns in Beijing-Tianjin-Hebei and the Yangtze River Delta regions. *Environmental Pollution*, 248, 74-  
 1106 81, <https://doi.org/10.1016/j.envpol.2019.01.124>, 2019.
- 1107 Liu, Z., Liu, Q., Lin, H. C., Schwartz, C. S., Lee, Y. H. and Wang, T.: Three-dimensional variational assimilation of  
 1108 MODIS aerosol optical depth: Implementation and application to a dust storm over East Asia, *J. Geophys. Res.*  
 1109 *Atmos.*, 116(23), 1– 19, doi:10.1029/2011JD016159, 2011.
- 1110 Liu, D., Zhao, T., Boiyio, R., Chen, S., Lu, Z., Wu, Y., Zhao, Y.: Vertical structures of dust aerosols over East Asia  
 1111 based on CALIPSO retrievals. *Remote Sens.*, 11, 701; doi:10.3390/rs11060701, 2019.
- 1112 Livingston, J. M., Russell, P. B., Reid, J. S., Redemann, J., Schmidt, B., Allen, D. A., Torres, O., Levy, R. C.,  
 1113 Remer, L. A., Holben, B. N., Smirnov, A., Dubovik, O., Welton, E. J., Campbell, J. R., Wang, J., Christopher, S.  
 1114 A.: Airborne Sun photometer measurements of aerosol optical depth and columnar water vapor during the Puerto  
 1115 Rico Dust Experiment and comparison with land, aircraft, and satellite measurements, *J. Geophys. Res.*, 108, 8588,  
 1116 doi:10.1029/2002JD002520, D19, 2003.
- 1117 Luo, B., Minnett, P. J., Gentemann, C., and Szczodrak, G.: Improving satellite retrieved night-time infrared sea  
 1118 surface temperatures in aerosol contaminated regions. *Remote Sensing of Environment*, 223, 8-20,  
 1119 <https://doi.org/10.1016/j.rse.2019.01.009>, 2019.
- 1120 Lynch, P., Reid, J. S., Westphal, D. L., Zhang, J., Hogan, T. F., Hyer, E. J., Curtis, C. A., Hegg, D. A., Shi, Y.,  
 1121 Campbell, J. R., Rubin, J. I., Sessions, W. R., Turk, F. J., and Walker, A. L.: An 11-year global gridded aerosol  
 1122 optical thickness reanalysis (v1.0) for atmospheric and climate sciences, *Geosci. Model Dev.*, 9, 1489–1522,  
 1123 <https://doi.org/10.5194/gmd-9-1489-2016>, 2016.
- 1124 Marsham, J. H., Parker, D. J., Grams, C. M., Johnson, B. T., Grey, W. M. F., & Ross, A. N.: Observations of  
 1125 mesoscale and boundary-layer scale circulations affecting dust transport and uplift over the Sahara. *Atmospheric*  
 1126 *Chemistry and Physics*, 8(23), 6979– 6993, <https://doi.org/10.5194/acp-8-6979-2008>, 2008.
- 1127 Marsham, J. H., Parker, D. J., Todd, M. C., Banks, J. R., Brindley, H. E., Garcia-Carreras, L., Roberts, A. J., and  
 1128 Ryder, C. L.: The contrasting roles of water and dust in controlling daily variations in radiative heating of the  
 1129 summertime Saharan heat low, *Atmos. Chem. Phys.*, 16, 3563–3575, <https://doi.org/10.5194/acp-16-3563-2016>,  
 1130 2016.
- 1131 Martins, V. S., Novo, E. M. L. M., Lyapustin, A., Aragão, L. E. O. C., Freitas, S. R., Barbosa, C. C. F: Seasonal and  
 1132 interannual assessment of cloud cover and atmospheric constituents across the Amazon (2000–2015): Insights for  
 1133 remote sensing and climate analysis, *ISPRS Journal of Photogrammetry and Remote Sensing*, 145, 309-327,  
 1134 <https://doi.org/10.1016/j.isprsjprs.2018.05.013>, 2018.
- 1135 Ménard, R., Gauthier, P., Rochon, Y., Robichaud, A., de Grandpré, J., Yang, Y., Charrette, C., and Chabrilat, S.:  
 1136 Coupled Stratospheric Chemistry–Meteorology Data Assimilation. Part II: Weak and Strong  
 1137 Coupling. *Atmosphere*, 10, 798, <https://doi.org/10.3390/atmos10120798> , 2019.
- 1138 Mortier, A., Goloub, P., Derimian, Y., Tanre, D., Podvin, T., Blarel, L., Deroo, C., Marticorena, B., Diallo, A., and  
 1139 Ndiaye, T.: Climatology of aerosol properties and clear-sky shortwave radiative effects using Lidar and Sun  
 1140 photometer observations in the Dakar site, *J. Geophys. Res. Atmos.*, 121(11),  
 1141 <https://doi.org/10.1002/2015JD024588>, 2016.





1142

- 1143 O'Neill, N. T., Royer, A., Coté, P., McArthur, L. J. B., Relations between optically derived aerosol parameters,  
 1144 humidity, and air-quality data in an urban atmosphere, *J. Appl Meteor.*, 32, 1484–1498,  
 1145 [https://doi.org/10.1175/1520-0450\(1993\)032<1484:RBODAP>2.0.CO;2](https://doi.org/10.1175/1520-0450(1993)032<1484:RBODAP>2.0.CO;2)1993, 1993.
- 1146 Patadia, F., Levy, R. C., and Mattoo, S.: Correcting for trace gas absorption when retrieving aerosol optical depth  
 1147 from satellite observations of reflected shortwave radiation, *Atmos. Meas. Tech.*, 11, 3205–3219,  
 1148 <https://doi.org/10.5194/amt-11-3205-2018>, 2018.
- 1149 Perez-Ramirez, D., Whiteman, D.N., Smirnov, A., Lyamani, H., Holben, B.N., Pinker, R., Andrade, M., Alados-  
 1150 Arboledas, L.: Evaluation of AERONET precipitable water vapor versus microwave radiometry, GPS, and  
 1151 radiosondes at ARM sites, *J. Geophys. Res. Atmos.*, 119(15), <https://doi.org/10.1002/2014JD021730>, 2014.
- 1152 Perry, K.D., and Hobbs P.V.: Influences of isolated cumulus clouds on the humidity of their surroundings *Journal of*  
 1153 *the Atmospheric Sciences*. 53: 159–174. DOI: [https://doi.org/10.1175/1520-](https://doi.org/10.1175/1520-0469(1996)053<0159:IOICCO>2.0.CO;2)  
 1154 [0469\(1996\)053<0159:IOICCO>2.0.CO;2](https://doi.org/10.1175/1520-0469(1996)053<0159:IOICCO>2.0.CO;2), 1996.
- 1155 Pistone, K., Praveen, P. S., Thomas, R. M., Ramanathan, V., Wilcox, E. M., and Bender, F. A.-M.: Observed  
 1156 correlations between aerosol and cloud properties in an Indian Ocean trade cumulus regime, *Atmos. Chem. Phys.*,  
 1157 16, 5203–5227, <https://doi.org/10.5194/acp-16-5203-2016>, 2016.
- 1158 Pistone, K., Zuidema, P., Wood, R., Diamond, M., da Silva, A. M., Ferrada, G., Saide, P. E., Ueyama, R., Ryoo, J.-  
 1159 M., Pfister, L., Podolske, J., Noone, D., Bennett, R., Stith, E., Carmichael, G., Redemann, J., Flynn, C., LeBlanc, S.,  
 1160 Segal-Rozenhaimer, M., and Shinozuka, Y.: Exploring the elevated water vapor signal associated with the free  
 1161 tropospheric biomass burning plume over the southeast Atlantic Ocean, *Atmos. Chem. Phys.*, 21, 9643–9668,  
 1162 <https://doi.org/10.5194/acp-21-9643-2021>, 2021.
- 1163 Radke L.F., and Hobbs, P.V.: Humidity and particle fields around some small cumulus clouds, *Journal of the*  
 1164 *Atmospheric Sciences*. 48: 1190–1193. DOI: [10.1175/1520-0469\(1991\)](https://doi.org/10.1175/1520-0469(1991)048<1190:HFAPF>2.0.CO;2), 1991.
- 1165 Reid, J. S., Kinney, J. E., Westphal, D. L., Holben, B. N., Welton, E. J., Tsay, S.-C., Christopher, S. A., Eleuterio,  
 1166 D. P., Campbell, J. R., Jonsson, H. H., Livingston, J. M., Maring, H. B., Meier, M., Pilewskie, P., Reid, E. A.,  
 1167 Russell, P. B., Savoie, D., Smirnov, A., and D. Tanré D.: Analysis of measurements of Saharan dust by airborne  
 1168 and ground-based remote sensing methods during the Puerto Rico Dust Experiment (PRIDE), *J. Geophys. Res.*, 108,  
 1169 8586, doi:10.1029/2002JD002493, D19, 2003.
- 1170 Reid, J. S., Piketh, S., Burger, R., Ross, K., Jensen, T., Bruinjes, R., Walker, A., Al Mandoos, A., Miller, S., Hsu,  
 1171 C., Kuciauskas, A., and Westphal, D. L.: An overview of UAE2 flight operations: Observations of summertime  
 1172 atmospheric thermodynamic and aerosol profiles of the southern Arabian Gulf, *J. Geophys. Res.*, 113, D14213,  
 1173 doi:10.1029/2007JD009435, 2008.
- 1174 Reid, J. S., Hyer, E. J., Johnson, R., Holben, B. N., Yokelson, R. J., Zhang, J., Campbell, J.R., Christopher, S.A., Di  
 1175 Girolamo, L., Giglio, L., Holz, R.E., Kearney, C., Miettinen, J., Reid, E.A., Turk, F.J., Wang, J., Xian, P., Zhao, G.,  
 1176 Balasubramanian, R., Chew, B.N., Janjai, S., Lagrosas, N., Lestari, P., Lin, N.-H., Mahmud, M., Nguyen, A.X.,  
 1177 Norris, B., Oanh, N.T.K., Oo, M., Salinas, S.V., Welton, E.J., and Liew, S.C.: Observing and understanding the  
 1178 Southeast Asian aerosol system by remote sensing: An initial review and analysis for the Seven Southeast Asian  
 1179 Studies (7SEAS) program. *Atmospheric Research*, 122, 403–468. <https://doi.org/10.1016/j.atmosres.2012.06.005>,  
 1180 2013.
- 1181 Reid, J. S., Posselt, D. J., Kaku, K., Holz, R. A., Chen, G., Eloranta, E. W., Kuehn, R. E., Woods, S., Zhang, J.,  
 1182 Anderson, B., Bui, T. P., Diskin, G. S., Minnis, P., Newchurch, M. J., Tanelli, S., Trepte, C. R., Thornhill, K. L., and  
 1183 Ziemba, L. D.: Observations and hypotheses related to low to middle free tropospheric aerosol, water vapor and  
 1184 altocumulus cloud layers within convective weather regimes: a SEAC4RS case study, *Atmos. Chem. Phys.*, 19,  
 1185 11413–11442, <https://doi.org/10.5194/acp-19-11413-2019>, 2019.
- 1186 Reid, J.S., Gumber, A., Zhang, J., Holz, R.E., Rubin, J.I., Xian, P., Smirnov, A., Eck, T.F., O'Neill, N.T., Levy  
 1187 R.C., Reid, E.A., Colarco, P.R., Benedetti, A., Tanaka, T.: A Coupled Evaluation of Operational MODIS and Model  
 1188 Aerosol Products for Maritime Environments Using Sun Photometry: Evaluation of the Fine and Coarse  
 1189 Mode. *Remote Sensing*; 14(13):2978. <https://doi.org/10.3390/rs14132978>, 2022.



- 1190 Remer, L.A., Tanre, D., Kaufman, Y.J., Ichoku, C., Mattoo, S., Levy, R., Chu, D.A., Holben, B., Dubovik, O.,  
 1191 Smirnov, A., Martins, J.V., Li, R.-R., and Ahmad, Z.: Validation of MODIS aerosol retrieval over ocean,  
 1192 Geophysical Research Letters, 29(12), 1618, <https://doi.org/10.1029/2001GL013204>, 2002.
- 1193 Resquin, M.D., Santagata, D., Gallardo, L., Gomez, D., Rossler, C., Dawidowski, L.: Local and remote black carbon  
 1194 sources in the Metropolitan Area of Buenos Aires. Atmospheric Environment. Volume 182, Pages 105-114,  
 1195 <https://doi.org/10.1016/j.atmosenv.2018.03.018>, 2018.
- 1196 Rosário, N. E., Yamasoe, M. A., Brindley, H., Eck, T. F., and Schafer, J.: Downwelling solar irradiance in the  
 1197 biomass burning region of the southern Amazon: Dependence on aerosol intensive optical properties and role of  
 1198 water vapor, J. Geophys. Res., 116, D18304, doi:10.1029/2011JD015956, 2011.
- 1199 Ryder, C. L.: Radiative effects of increased water vapor in the upper Saharan Air Layer associated with enhanced  
 1200 dustiness. Journal of Geophysical Research: Atmospheres, 126, e2021JD034696,  
 1201 <https://doi.org/10.1029/2021JD034696>, 2021.
- 1202 Sano, I., Mukai, S., Yamao, M., Takamura, T., Nakajima, T., and Holben, B.: Calibration and Validation of  
 1203 Retrieved Aerosol Properties Based on AERONET and SKYNET, Advances in Space Research 32 (11): 2159–  
 1204 2164. doi:10.1016/S0273-1177(03)00685-9, 2003.
- 1205 Schneider, T., O’Gorman, P.A., and Levine, X.J.: Water vapor and the dynamics of climate changes, Rev. Geophys.,  
 1206 48, RG3001, doi:10.1029/2009RG000302, 2010.
- 1207 Sessions, W. R., Reid, J. S., Benedetti, A., Colarco, P. R., da Silva, A., Lu, S., Sekiyama, T., Tanaka, T. Y.,  
 1208 Baldasano, J. M., Basart, S., Brooks, M. E., Eck, T. F., Iredell, M., Hansen, J. A., Jorba, O. C., Juang, H.-M. H.,  
 1209 Lynch, P., Morcrette, J.-J., Moorthi, S., Mulcahy, J., Pradhan, Y., Razinger, M., Sampson, C. B., Wang,  
 1210 J., and Westphal, D. L.: Development towards a global operational aerosol consensus: basic climatological  
 1211 characteristics of the International Cooperative for Aerosol Prediction Multi-Model Ensemble (ICAP-MME),  
 1212 Atmos. Chem. Phys., 15, 335–362, doi:10.5194/acp-15-335-2015, 2015.
- 1213 Sherwood, S.C., Roca, R., Weckwerth, T.M., and Andronova, N.G.: Tropospheric water vapor, convection, and  
 1214 climate, Rev. Geophys., 48, RG2001, doi:10.1029/2009RG000301, 2010.
- 1215 Shi, Y. R., Levy, R. C., Eck, T. F., Fisher, B., Mattoo, S., Remer, L. A., Slutsker, I., and Zhang, J.: Characterizing  
 1216 the 2015 Indonesia fire event using modified MODIS aerosol retrievals, Atmos. Chem. Phys., 19, 259–274,  
 1217 <https://doi.org/10.5194/acp-19-259-2019>, 2019.
- 1218 Smirnov, A., Royer, A., O’Neill, N. T., and Tarussov, A.: A study of the link between synoptic air mass type and  
 1219 atmospheric optical parameters, J. Geophys. Res., 99(D10), 20967–20982, doi:10.1029/94JD01719, 1994.
- 1220 Sobrino, J.A., Li, Z.-L., and Stoll, M. P.: Impact of the atmospheric transmittance and total water vapor content in  
 1221 the algorithms for estimating satellite sea surface temperatures, *IEEE Transactions on Geoscience and Remote*  
 1222 *Sensing*, vol. 31, no. 5, pp. 946-952, doi: 10.1109/36.263765, 1993.
- 1223 Späth, F., Behrendt, A., Muppa, S. K., Metzendorf, S., Riede, A., and Wulfmeyer, V.: 3-D water vapor field in the  
 1224 atmospheric boundary layer observed with scanning differential absorption lidar, Atmos. Meas. Tech., 9, 1701–  
 1225 1720, <https://doi.org/10.5194/amt-9-1701-2016>, 2016.
- 1226 Spyrou C.: Direct radiative impacts of desert dust on atmospheric water content, Aerosol Science and  
 1227 Technology, 52:6, 693-701, DOI: 10.1080/02786826.2018.1449940, 2018.
- 1228 Stull, R. B. and Eloranta, E. W.: Boundary Layer Experiment 1983, Bull. Amer. Meteorol. Soc., 65, 450–456, DOI:  
 1229 10.1175/1520-0477(1984)065<0450:BLE>2.0.CO;2, 1984.
- 1230 Su, H., Jiang, J.H., Liu, X., Penner, J.E., Read, W.G., Massie, S., Schoeberl, M.R., Colarco, P., Livesey, N.J., and  
 1231 Santee, M.L.: Observed increase of TTL temperature and water vapor in polluted clouds over Asia, Journal of  
 1232 Climate, 24(11), 2728-2736, <https://doi.org/10.1175/2010JCLI3749.1>, 2011.
- 1233 Ten Hoeve, J. E., Remer, L. A., and Jacobson, M. Z.: Microphysical and radiative effects of aerosols on warm  
 1234 clouds during the Amazon biomass burning season as observed by MODIS: impacts of water vapor and land cover,  
 1235 Atmos. Chem. Phys., 11, 3021–3036, <https://doi.org/10.5194/acp-11-3021-2011>, 2011.



- 1236 Tesche, M., Gross, S., Ansmann, A., Muller, D., Althausen, D., Freudenthaler, V., and Esselborn, M.: Profiling of  
 1237 Saharan dust and biomass-burning smoke with multiwavelength polarization Raman lidar at Cape Verde, Tellus B,  
 1238 63B, 649–676, DOI: 10.1111/j.1600-0889.2011.00548.x, 2011.
- 1239 Turner D.D., Ferrare, R.A., Heilman Brasseur, L.A., Feltz, W.F., and Tooman, T.P.: Automated Retrievals of Water  
 1240 Vapor and Aerosol Profiles from an Operational Raman Lidar. J.  
 1241 Atmos. Oceanic Tech, 19, 37–50, DOI:10.1175/1520-0426(2002), 2002.
- 1242 Veselovskii, I., Goloub, P., Podvin, T., Bovchaliuk, V., Derimian, Y., Augustin, P., Fourmentin, M., Tanre, D.,  
 1243 Korenskiy, M., Whiteman, D. N., Diallo, A., Ndiaye, T., Kolgotin, A., and Dubovik, O.: Retrieval of optical and  
 1244 physical properties of African dust from multiwavelength Raman lidar measurements during the SHADOW  
 1245 campaign in Senegal, Atmos. Chem. Phys., 16, 7013–7028, doi:10.5194/acp-16-7013-2016, 2016.
- 1246 Wang, Y., Hua, D., Wang, L., Tang, J., Mao, J., and Kobayashi, T.: Observations and analysis of relationship  
 1247 between water vapor and aerosols using raman lidar, Jpn. J. Appl. Phys., 51, 102401,  
 1248 <http://dx.doi.org/10.1143/JJAP.51.102401>, 2012.
- 1249 Wang, J., Gei, C., Yang, Z., Hyer, E. J., Reid, J. S., Chew, B. N., Mahmud M.: Mesoscale modeling of smoke  
 1250 transport over the Southeast Asian Maritime Continent: interplay of sea breeze, trade wind, typhoon, and  
 1251 topography, Atmos. Res., 122, 486–503, <https://doi.org/10.1016/j.atmosres.2012.05.009>, 2013.
- 1252 Wang, H., Xu, J., Zhang, M., Yang, Y., Shen, X., Wang, Y., Chen, D., Guo, J. A Study of the meteorological causes  
 1253 of a prolonged and severe haze episode in January 2013 over central-eastern China, Atmospheric Environment, 98,  
 1254 146–157, <https://doi.org/10.1016/j.atmosenv.2014.08.053>, 2014.
- 1255 Wang, L. T., Wei, Z., Yang, J., Zhang, Y., Zhang, F. F., Su, J., Meng, C. C., and Zhang, Q.: The 2013 severe haze  
 1256 over southern Hebei, China: model evaluation, source apportionment, and policy implications, Atmos. Chem. Phys.,  
 1257 14, 3151–3173, <https://doi.org/10.5194/acp-14-3151-2014>, 2014.
- 1258 Wimmers, A. J., C. S. Velden: Seamless Advective Blending of Total Precipitable Water Retrievals from Polar-  
 1259 Orbiting Satellites. J. Appl. Meteor. Climatol., 50, 1024–1036. doi: <http://dx.doi.org/10.1175/2010JAMC2589.1>,  
 1260 2011.
- 1261 Wong, S., Dessler, A. E., Mahowald, N. M., Yang, P., & Feng, Q.: Maintenance of lower tropospheric temperature  
 1262 inversion in the Saharan air layer by dust and dry anomaly. Journal of  
 1263 Climate, 22(19), 5149–5162. <https://doi.org/10.1175/2009jcli2847.1>, 2009.
- 1264 Yu, S., Alapaty, K., Mathur, R. , Pleim, J., Zhang, Y., Nolte, C., Eder, B., Foley, K., and Nagashima, Attribution of  
 1265 the United States “warming hole”: Aerosol indirect effect and precipitable water vapor, Sci Rep, 4, 6929,  
 1266 <https://doi.org/10.1038/srep06929>, 2014.
- 1267 Yu, L., Zhang, M., Wang, L., Lu, Y., and Li, J.: Effects of aerosols and water vapour on spatial-temporal variations  
 1268 of the clear-sky surface solar radiation in China, Atmospheric Research, 248, 105162,  
 1269 <https://doi.org/10.1016/j.atmosres.2020.105162>, 2021.
- 1270 Yufeng, W., Qiang, F., Meina, Z., Fei, G., Huige, D., Yuehui, S., Dengxin, A.: UV multifunctional Raman lidar  
 1271 system for the observation and analysis of atmospheric temperature, humidity, aerosols and their conveying  
 1272 characteristics over Xi’an, J. of Quant Spect. And Rad. Trans, 205, 114–126,  
 1273 <https://doi.org/10.1016/j.jqsrt.2017.10.001>, 2018.
- 1274 Xian, P., Reid, J., Hyer, E., Sampson, C. Rubin, J., Ades, M., Asencio, N., Basart, S., Benedetti, A., Bhattacharjee,  
 1275 P.S., Brooks, M.E., Colarco, P.R., da Silva, A.M., Eck, T.F., Guth, J., Jorba, O., Kouznetsov, R., Kipling, Z., Sofiev,  
 1276 M., Perez Garcia-Pando, C., Pradhan, Y., Tanaka, T., Wang, J., Westphal, D.L., Yumimoto, K., and Zhang, J.:  
 1277 Current state of the global operational aerosol multi-model ensemble: An update from the International Cooperative  
 1278 for Aerosol Prediction (ICAP). Q.J.R. Meteorol. Soc. 145 (Suppl. 1): 176–209, DOI: 10.1002/qj.3497, 2019.
- 1279 Xian, P., Klotzbach, P. J., Dunion, J. P., Janiga, M. A., Reid, J. S., Colarco, P. R., and Kipling, Z.: Revisiting the  
 1280 relationship between Atlantic dust and tropical cyclone activity using aerosol optical depth reanalyses: 2003–2018,  
 1281 Atmos. Chem. Phys., 20, 15357–15378, <https://doi.org/10.5194/acp-20-15357-2020>, 2020.
- 1282 Zeng, Z.-C., Zhang, Q., Natraj, V., Margolis, J. S., Shia, R.-L., Newman, S., Fu, D., Pongetti, T. J., Wong, K. W.,  
 1283 Sander, S. P., Wennberg, P. O., and Yung, Y. L.: Aerosol scattering effects on water vapor retrievals over the Los  
 1284 Angeles Basin, Atmos. Chem. Phys., 17, 2495–2508, <https://doi.org/10.5194/acp-17-2495-2017>, 2017.



- 1285 Zhang, J., Reid, J.S., Westphal, D.L., Baker, N.L., and Hyer, E.J.: A system for operational aerosol optical depth  
1286 data assimilation over global oceans, *Journal of Geophysical Research: Atmospheres*, 113(D10),  
1287 <https://doi.org/10.1029/2007JD009065>, 2008.
- 1288 Zhang, J., Wang, S., Guo, Y., Zhang, R., Qin, X., Huang, K., Wang, D., Fu, Q., Wang, J., and Zhou, B.: Aerosol  
1289 vertical profile retrieved from ground-based MAX-DOAS observation and characteristic distribution during the  
1290 wintertime in Shanghai, China, *Atmospheric Environment*, 192, 193-205,  
1291 <https://doi.org/10.1016/j.atmosenv.2018.08.051>, 2018.
- 1292 Zhu, J., Che, H., Xia, X., Yu, X., Wang, J.: Analysis of water vapor effects on aerosol properties and direct radiative  
1293 forcing in China, *Science of The Total Environment*, 650, 257-266, <https://doi.org/10.1016/j.scitotenv.2018.09.022>,  
1294 2019.
